# Supplementary material for: Alternative splicing is coupled to gene expression in a subset of variably expressed genes
Source: PubMed Central journal article supplement (PMC11535429; doi:10.1038/s41525-024-00432-w), 2024-11-04
Supplement: 41525_2024_432_MOESM1_ESM.pdf [file 41525_2024_432_MOESM1_ESM.pdf]

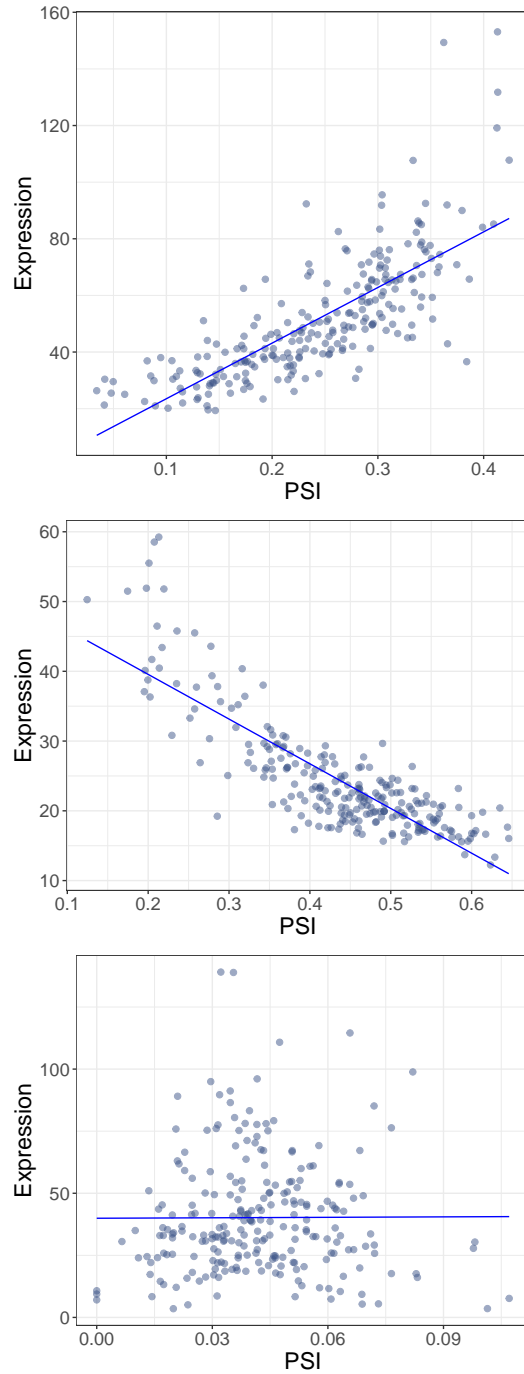

**Figure 1: The expression of genes containing UHP (upregulated-high  $\psi$ ), DHP (downregulated-high  $\psi$ ), and type 0 exons as a function of the proportion of transcripts including these exons.** The expression value and proportions were computed in Spleen. The x-axis shows the proportion of transcript counts for transcripts that include the exon (percent-spliced in,  $\psi$ ), and the y-axis value is the gene expression or total number of transcript counts for the gene. The genes for the UHP, DHP and type 0 exons displayed in this figure, *CASP8*, *CSTF3* and *ANPEP*, are shown from top to bottom. Figures were created using ggpubr.

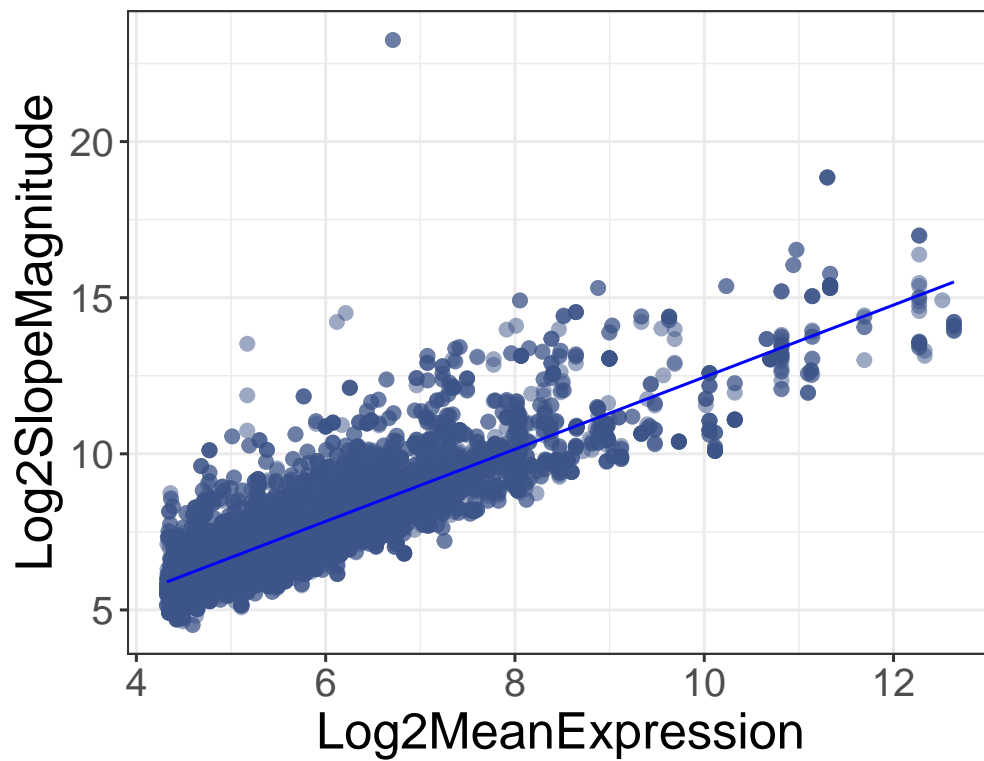

**Figure 2:**  $\log_2$  Expression- $\psi$  regression slopes vs  $\log_2$  mean expression. This Figure the mean expression of genes with at least one UHP or DHP exon (X-axis) with the absolute value of the slope of the the corresponding expression-percent-spliced-in ( $\psi$ ) regression curve (Y-axis). The figure was created using ggpubr.

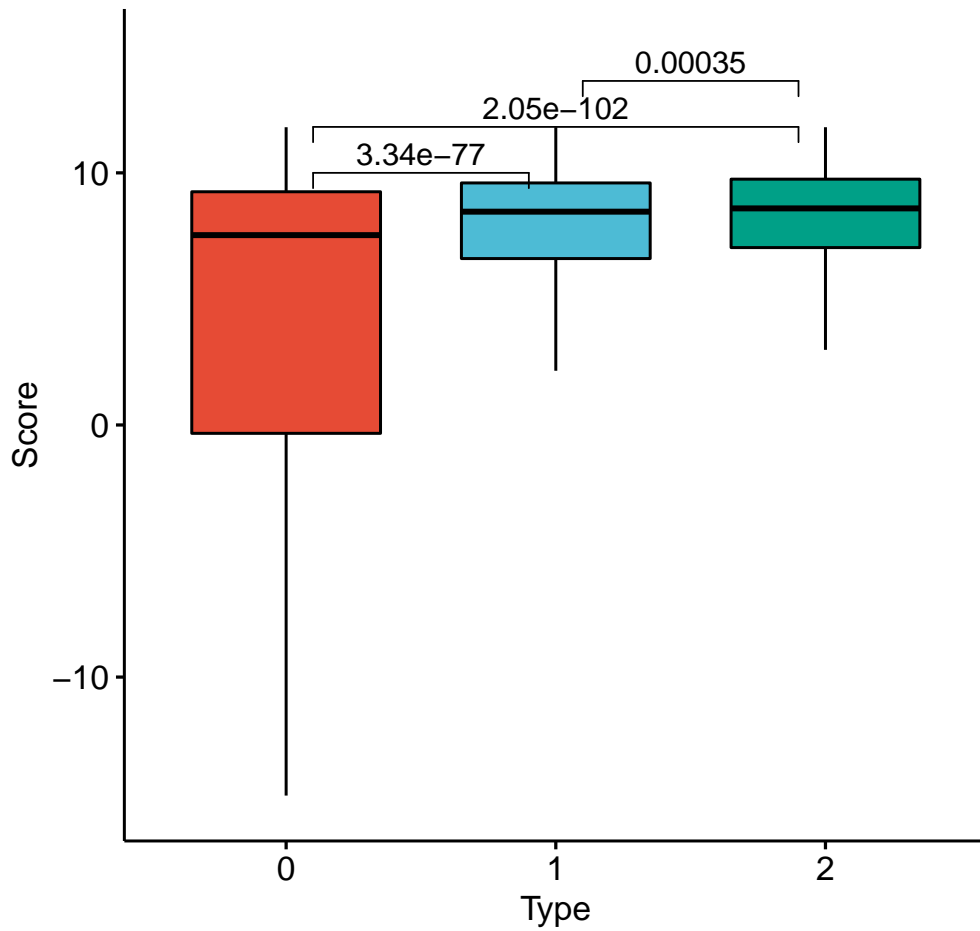

**Figure 3: 5' (donor) splice score distributions.** Boxplots illustrate the distribution of the 5' donor splice score calculated using MaxEntScan (39). 0: type 0 exon; 1: UHP exon; 2: DHP exon. The figure was generated using ggpubr. Boxplot whisker lengths are the default(1.5 IQR).

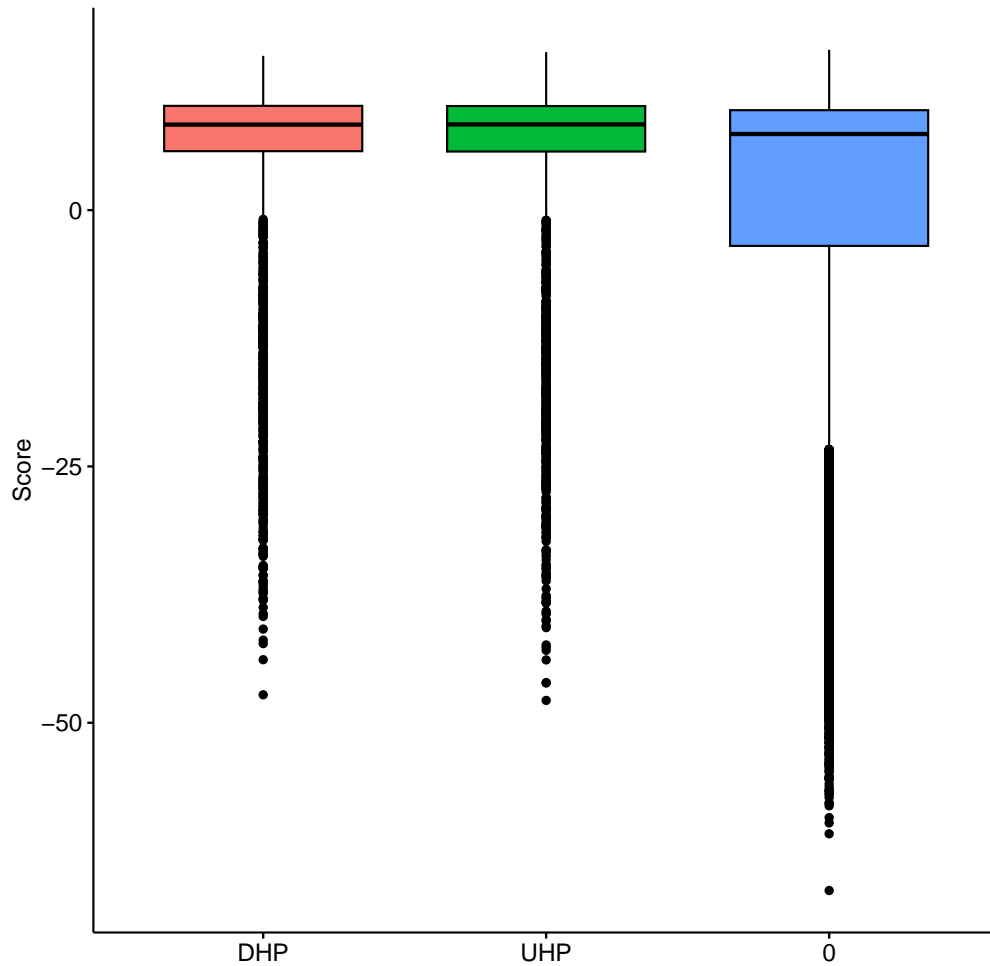

**Figure 4: 3' (acceptor) splice score distributions.** Boxplots illustrate the distribution of the 3' donor splice score calculated using MaxEntScan (39). The Mann-Whitney p-value of DHP vs type 0 was  $p = 2.09^{-43}$ , of UHP vs type 0 is  $p = 1.19^{-48}$ , and UHP vs DHP was  $p = 0.95$ . 0: type 0 exon; 1: UHP exon; 2: DHP exon. The figure was generated using ggpubr. Boxplot whisker lengths are the default(1.5 IQR).

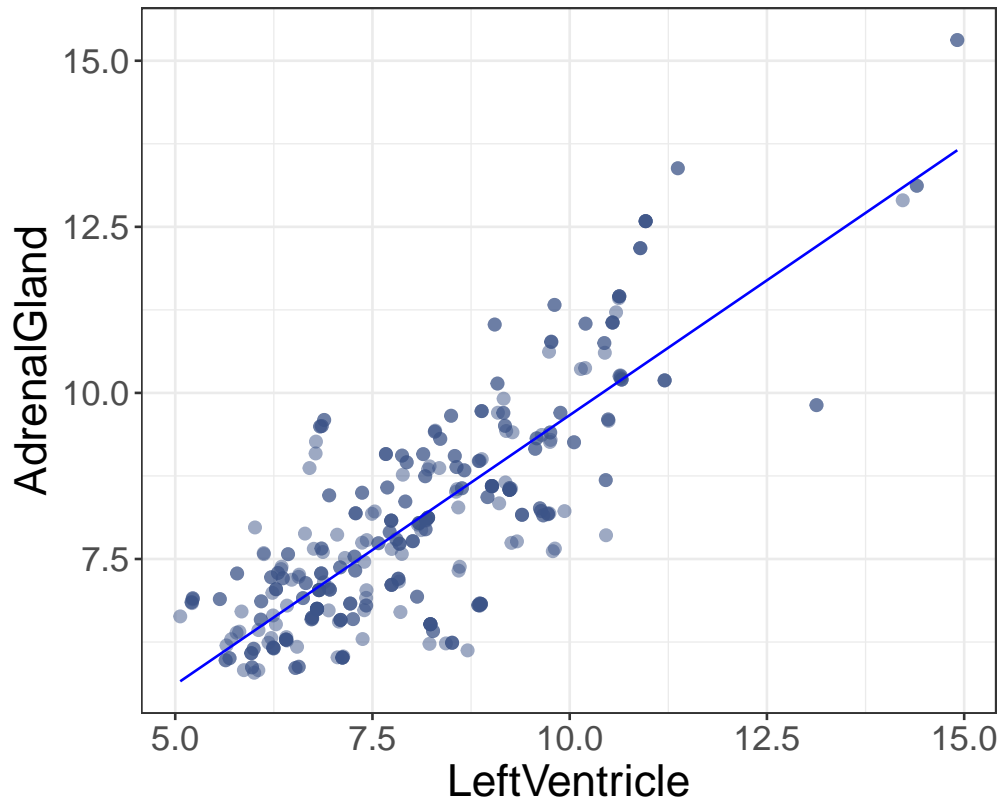

**Figure 5: Expression- $\psi$  log2-regression slopes in Heart left ventricle vs adrenal gland.** Each point represents the absolute value of the slope of the expression-percent-spliced-in ( $\psi$ ) regression curves for one UHP or DHP exon. The figure was generated using ggpubr.

UHP Isoforms out of Jun Kinase Signaling Isoforms

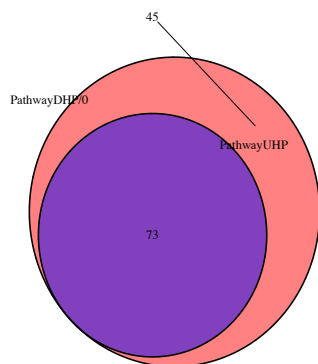

UHP Isoforms out of UHP,DHP and Type 0 Isoforms

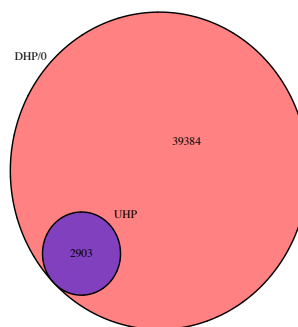

**Figure 6: Over-representation UHP-containing isoforms.** Proportion of UHP-containing isoforms out of all isoforms belonging to the Jun kinase signaling GO term (left) and the same proportion out of all isoforms containing UHP,DHP or a type 0 exon. The isoforms are over-represented in the Jun kinase signaling GO term.(Benjamini-Hochberg corrected hyper geometric  $p = 1.57^{-51}$ )

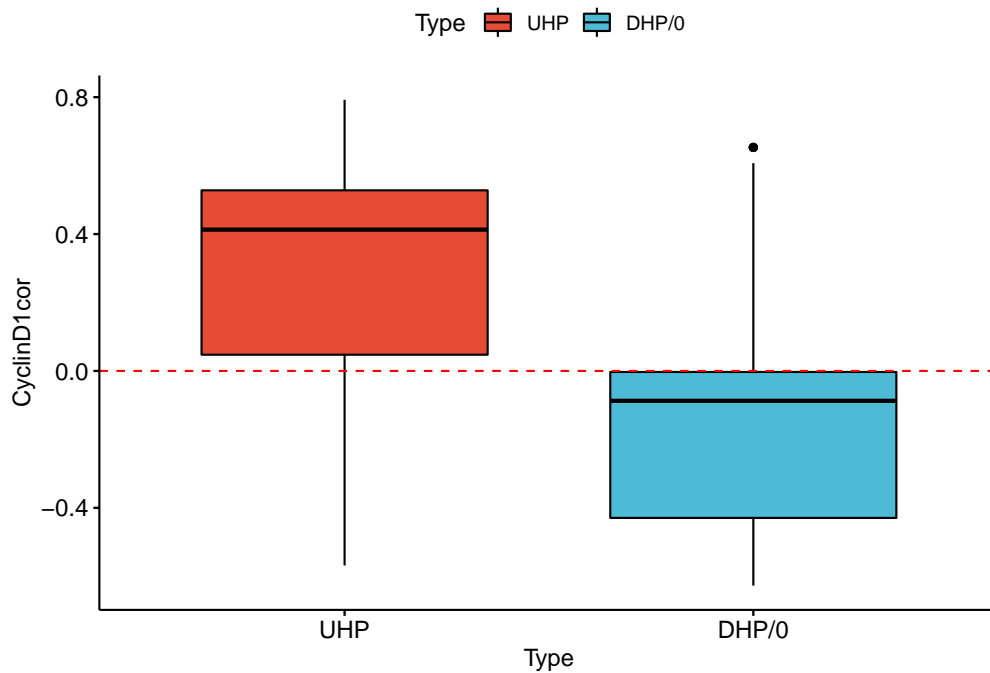

**Figure 7: Pearson correlation between PSI of UHP/DHP/Type 0 exons and Cyclin D1 gene expression in the GTEx dataset.** Pearson correlation between the expression levels of Cyclin D1 and the PSI of every exon was computed across all GTEx tissues that were examined in this study. Cyclin D1 expression is a proxy for the level of mitosis. As the figure shows, UHP exons are mostly positively correlated with Cyclin D1 expression, and other exons are mostly negatively correlated. The figure was generated using ggpubr. Boxplot whisker lengths are the default (1.5 IQR).

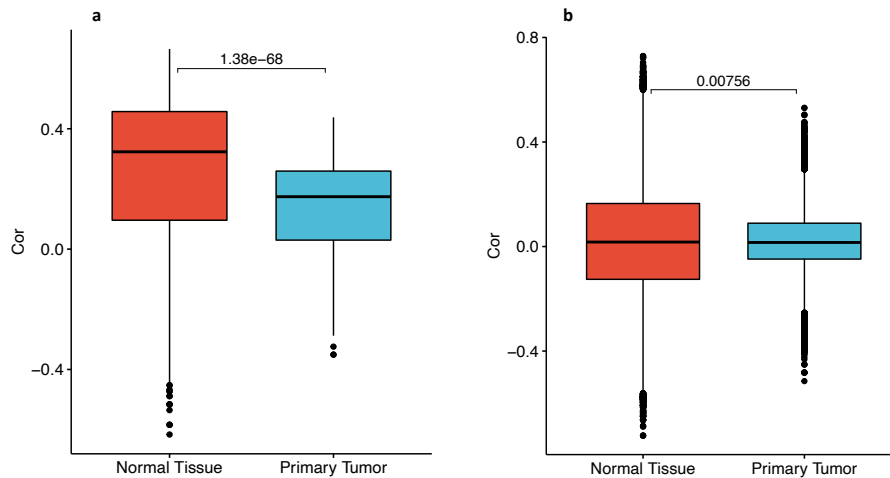

**Figure 8: Pearson correlation between PSI of UHP/Type 0 exons and Cyclin D1 gene expression.** Pearson correlation between the expression levels of Cyclin D1 and the PSI of every exon was computed in TCGA samples classified as 'Thyroid Carcinoma', separately in the 'Solid Tissue Normal' and 'Primary Tumor' sub-categories, for UHP exons (a) and Type 0 exons (b). UHP exons are mostly positively correlated with Cyclin D1 expression, and Type 0 exons have a median correlation of approximately 0. In tumor, the correlation is significantly reduced compared to healthy tissue (Mann-Whitney p-values displayed in the figure), with the gap being significantly larger for UHP exons (for UHP medians of 0.32 and 0.17 for normal and tumor tissues, respectively, and for Type 0 exons medians of 0.017 and 0.016, for normal and tumor tissues, respectively). The figure was generated using ggpubr. Boxplot whisker lengths are the default (1.5 IQR).



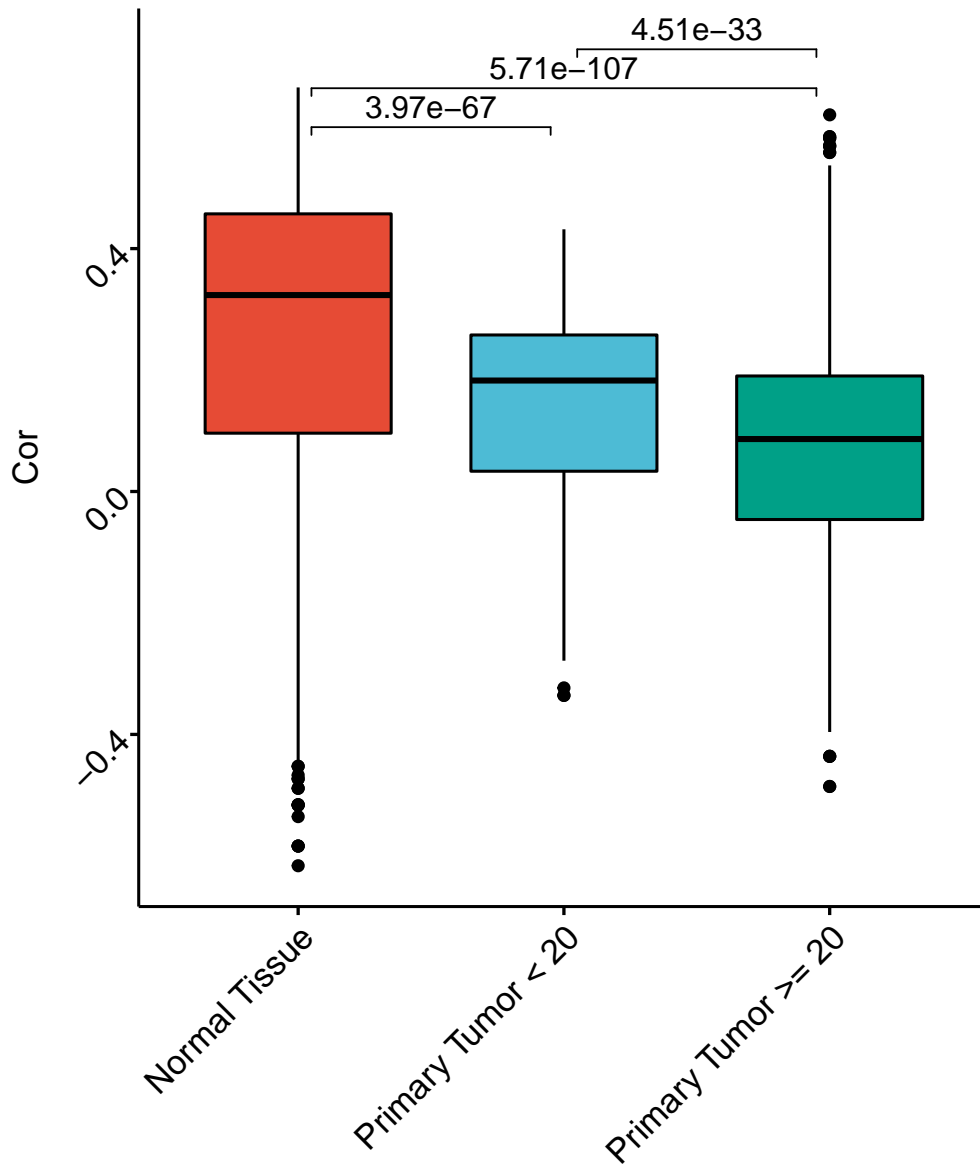

**Figure 9: Pearson correlation between PSI of UHD and Cyclin D1 gene expression, in healthy tissue vs. cancer tissue with varying levels of nonsilent mutations .** Pearson correlation between the expression levels of Cyclin D1 and the PSI of every exon was computed in TCGA samples classified as 'Thyroid Carcinoma', separately in the 'Solid Tissue Normal' and 'Primary Tumor' sub-categories, for UHP exons. Cancer tissues were separated into two categories, those that had less than 20 nonsilent mutations (SNPs and indels) and those that had 20 or more. The correlation decrease significantly in both cancer groups, and as the number of non-silent mutations increases. The median correlation is 0.32, 0.18 and 0.086 for normal tissue, tumor tissue with less than 20 nonsilent mutations, and tumor tissue with 20 or more nonsilent mutations, respectively. The figure was generated using ggpubr. Boxplot whisker lengths are the default (1.5 IQR)

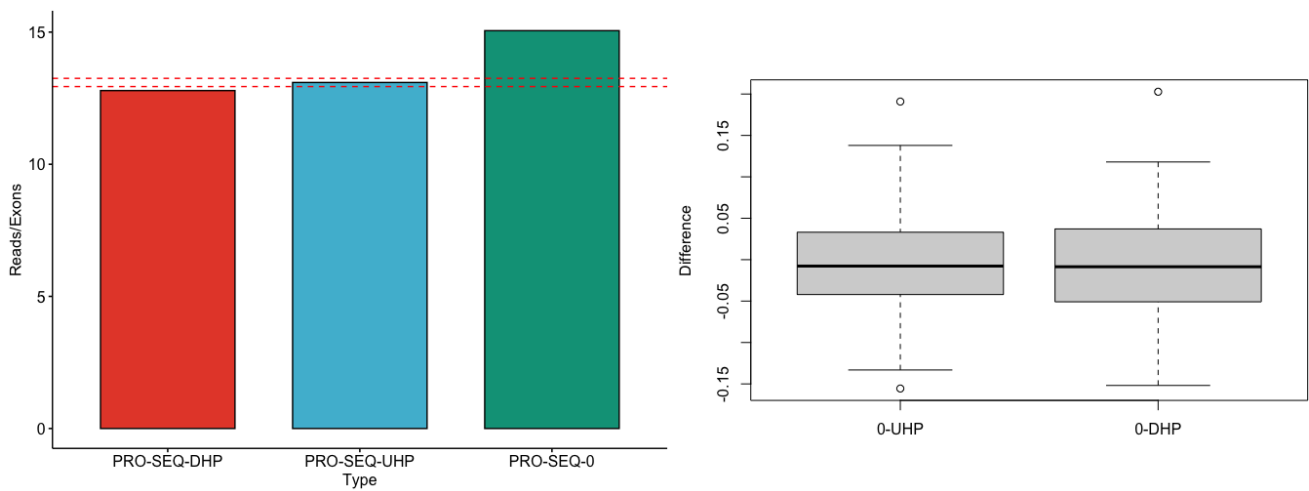

**Figure 10: ChIP-Seq counts per exon type count in exons.** Left: ChIP-Seq counts per exon type count in 105 BED files of ChIP-Seq POLR2A peaks in human cells, obtained from the encode project. The dashed red lines represent the UHP/DHP value with the maximum difference between type 0 and UHP/DHP values in 100 random permutations. The maximum difference observed in random permutation is smaller than the real difference. Right: Difference between type 0 and UHP/DHP values in 100 random permutations. Randomly permuting the data eliminates the difference between the exon types that is observed in real data. The figure was generated using ggpubr. Boxplot whisker lengths are the default(1.5 IQR)

| Tissue                  | #Samples |
|-------------------------|----------|
| Adrenal Gland           | 258      |
| Brain - Cortex          | 255      |
| Breast - Mammary Tissue | 459      |
| Heart - Left Ventricle  | 432      |
| Liver                   | 226      |
| Pancreas                | 328      |
| Pituitary               | 283      |
| Spleen                  | 241      |
| Thyroid                 | 653      |

**Table 1:** Organs included in the analysis. The column “#Samples” shows the number of samples used from the GTEx RNA-seq resource (37) for the current analysis.

| Dataset | Breast tissue          | Left Ventricle         | Liver                 |
|---------|------------------------|------------------------|-----------------------|
| SRA     | SRP301453              | SRP237337              | SRP326468             |
| DHP/DHP | 115                    | 128                    | 14                    |
| UHP/UHP | 34                     | 179                    | 1                     |
| DHP/UHP | 7                      | 41                     | 0                     |
| UHP/DHP | 5                      | 53                     | 0                     |
| FET     | $1.15 \times 10^{-22}$ | $1.54 \times 10^{-26}$ | $6.67 \times 10^{-2}$ |

**Table 2: UHP/DHP/type 0 exon analysis on three external datasets.** We repeated our analysis of UHP/DHP/type 0 exons on three external datasets from NCBI’s sequence read archive (SRA) (48). In all three datasets, most of the overlapping exons were type 0 in both the GTEx and the SRA dataset, and most of the other exons were type 0 in one of the datasets (not shown in the table). Rows such as “DHP/UHP” show the counts of exons that were classified as indicated in the SRA/GTEx datasets. FET: Fischer’s Exact Text p-value. These results suggest that there is a significant consistency of exon types across different donor cohorts and experimental procedures.

**Table 3:** Frequency of occurrence of Transcription Factor Binding Sites (TFBS). See main text for definitions of type 0, UHP, and DHP. The Bonferroni corrected threshold of  $\alpha = 0.05$  is  $9.11 \times 10^{-5}$ . \*) significant at this threshold.

| TFBS                 | type 0 | UHP   | DHP   | 0 vs. UHP               | 0 vs DHP                | UHP vs. DHP             |
|----------------------|--------|-------|-------|-------------------------|-------------------------|-------------------------|
| ARNT2 (TFFM0853.1)   | 9.0%   | 9.7%  | 10.5% | 0.006970                | $p < 10^{-6}$ *         | 0.008200                |
| ARNTL (TFFM0162.1)   | 1.7%   | 2.4%  | 2.4%  | $p < 10^{-6}$ *         | $p < 10^{-6}$ *         | n.s                     |
| ASCL1 (TFFM0131.1)   | 24.6%  | 21.6% | 22.0% | $p < 10^{-6}$ *         | $p < 10^{-6}$ *         | n.s                     |
| ASCL1 (TFFM0131.2)   | 27.6%  | 25.3% | 25.5% | $p < 10^{-6}$ *         | $p < 10^{-6}$ *         | n.s                     |
| ASCL1 (TFFM0890.1)   | 28.2%  | 25.2% | 25.6% | $p < 10^{-6}$ *         | $p < 10^{-6}$ *         | n.s                     |
| ASCL2 (TFFM0440.1)   | 14.7%  | 12.5% | 13.3% | $p < 10^{-6}$ *         | $p < 10^{-6}$ *         | 0.041738                |
| ATF2 (TFFM0653.1)    | 6.1%   | 7.4%  | 7.2%  | $p < 10^{-6}$ *         | $p < 10^{-6}$ *         | n.s                     |
| ATF3 (TFFM0003.2)    | 5.4%   | 6.6%  | 6.3%  | $p < 10^{-6}$ *         | $3.90 \times 10^{-5}$ * | n.s                     |
| ATF4 (TFFM0163.2)    | 2.2%   | 2.4%  | 3.1%  | n.s                     | $p < 10^{-6}$ *         | $7.90 \times 10^{-5}$ * |
| BCL6 (TFFM0006.1)    | 18.0%  | 16.1% | 16.4% | $p < 10^{-6}$ *         | $p < 10^{-6}$ *         | n.s                     |
| BHLHE22 (TFFM0165.1) | 26.2%  | 23.3% | 23.2% | $p < 10^{-6}$ *         | $p < 10^{-6}$ *         | n.s                     |
| BHLHE22 (TFFM0794.1) | 26.0%  | 23.1% | 23.2% | $p < 10^{-6}$ *         | $p < 10^{-6}$ *         | n.s                     |
| BHLHE22 (TFFM0892.1) | 25.6%  | 22.6% | 22.7% | $p < 10^{-6}$ *         | $p < 10^{-6}$ *         | n.s                     |
| CREB1 (TFFM0012.2)   | 4.4%   | 5.5%  | 5.3%  | $p < 10^{-6}$ *         | $p < 10^{-6}$ *         | n.s                     |
| CTCFL (TFFM0133.2)   | 21.5%  | 23.8% | 23.4% | $p < 10^{-6}$ *         | $p < 10^{-6}$ *         | n.s                     |
| ELF3 (TFFM0170.2)    | 10.3%  | 8.5%  | 8.5%  | $p < 10^{-6}$ *         | $p < 10^{-6}$ *         | n.s                     |
| ELF4 (TFFM0472.1)    | 20.6%  | 18.6% | 20.0% | $p < 10^{-6}$ *         | n.s                     | 0.001419                |
| ETS2 (TFFM0858.1)    | 8.5%   | 6.9%  | 6.5%  | $p < 10^{-6}$ *         | $p < 10^{-6}$ *         | n.s                     |
| ETV4 (TFFM0173.1)    | 14.2%  | 12.3% | 12.5% | $p < 10^{-6}$ *         | $p < 10^{-6}$ *         | n.s                     |
| ETV5 (TFFM0480.1)    | 7.8%   | 6.9%  | 6.1%  | 0.000110                | $p < 10^{-6}$ *         | 0.003721                |
| ETV5 (TFFM0785.1)    | 4.9%   | 4.2%  | 3.7%  | $7.00 \times 10^{-5}$ * | $p < 10^{-6}$ *         | n.s                     |
| ETV6 (TFFM0174.1)    | 20.0%  | 18.2% | 19.4% | $p < 10^{-6}$ *         | n.s                     | 0.006593                |
| FOXA2 (TFFM0036.1)   | 13.8%  | 12.7% | 11.9% | 0.000145                | $p < 10^{-6}$ *         | 0.032277                |
| GABPA (TFFM0039.2)   | 25.7%  | 26.7% | 28.2% | n.s                     | $p < 10^{-6}$ *         | 0.002089                |
| GLIS1 (TFFM0492.1)   | 12.5%  | 14.9% | 14.8% | $p < 10^{-6}$ *         | $p < 10^{-6}$ *         | n.s                     |
| GMEB2 (TFFM0494.1)   | 6.1%   | 7.6%  | 7.7%  | $p < 10^{-6}$ *         | $p < 10^{-6}$ *         | n.s                     |
| HOXA13 (TFFM0504.1)  | 5.0%   | 4.4%  | 3.8%  | 0.001868                | $p < 10^{-6}$ *         | 0.008876                |
| HOXB13 (TFFM0180.1)  | 3.2%   | 2.8%  | 2.3%  | n.s                     | $p < 10^{-6}$ *         | 0.006023                |
| HOXC9 (TFFM0047.1)   | 6.6%   | 5.6%  | 5.5%  | $p < 10^{-6}$ *         | $p < 10^{-6}$ *         | n.s                     |
| IKZF1 (TFFM0509.1)   | 17.9%  | 15.2% | 16.2% | $p < 10^{-6}$ *         | $p < 10^{-6}$ *         | 0.016385                |
| IRF8 (TFFM0511.1)    | 14.4%  | 12.4% | 13.3% | $p < 10^{-6}$ *         | 0.000216                | 0.019470                |
| KLF9 (TFFM0827.1)    | 15.7%  | 17.6% | 16.1% | $p < 10^{-6}$ *         | n.s                     | 0.000287                |
| MITF (TFFM0141.2)    | 7.1%   | 8.1%  | 8.6%  | $5.30 \times 10^{-5}$ * | $p < 10^{-6}$ *         | 0.044470                |
| MNT (TFFM0191.1)     | 7.4%   | 8.6%  | 8.7%  | $p < 10^{-6}$ *         | $p < 10^{-6}$ *         | n.s                     |
| MZF1 (TFFM0531.1)    | 8.7%   | 11.2% | 10.8% | $p < 10^{-6}$ *         | $p < 10^{-6}$ *         | n.s                     |
| NEUROD1 (TFFM0143.1) | 30.6%  | 28.4% | 29.2% | $p < 10^{-6}$ *         | n.s                     | n.s                     |
| NFIC (TFFM0072.1)    | 6.1%   | 7.7%  | 7.6%  | $p < 10^{-6}$ *         | $p < 10^{-6}$ *         | n.s                     |
| NFIC (TFFM0072.2)    | 1.6%   | 1.0%  | 1.2%  | $p < 10^{-6}$ *         | n.s                     | n.s                     |
| NFIX (TFFM0761.1)    | 18.4%  | 16.1% | 17.1% | $p < 10^{-6}$ *         | 0.000178                | 0.013094                |
| NFYB (TFFM0075.1)    | 5.9%   | 4.9%  | 5.7%  | $p < 10^{-6}$ *         | n.s                     | 0.002848                |
| NKX2-5 (TFFM0076.1)  | 1.2%   | 1.7%  | 1.8%  | $p < 10^{-6}$ *         | $p < 10^{-6}$ *         | n.s                     |

Continued on next page

**Table 3 – continued from previous page**

| <b>TFBS</b>         | <b>type 0</b> | <b>UHP</b> | <b>DHP</b> | <b>0 vs. UHP</b>        | <b>0 vs DHP</b> | <b>UHP vs. DHP</b>      |
|---------------------|---------------|------------|------------|-------------------------|-----------------|-------------------------|
| NR2F1 (TFFM0869.1)  | 7.7%          | 6.5%       | 6.4%       | $p < 10^{-6} *$         | $p < 10^{-6} *$ | n.s                     |
| NR5A1 (TFFM0543.1)  | 5.1%          | 4.1%       | 4.0%       | $p < 10^{-6} *$         | $p < 10^{-6} *$ | n.s                     |
| NRF1 (TFFM0082.1)   | 12.2%         | 14.3%      | 15.2%      | $p < 10^{-6} *$         | $p < 10^{-6} *$ | 0.012840                |
| NRF1 (TFFM0732.1)   | 12.4%         | 15.0%      | 15.0%      | $p < 10^{-6} *$         | $p < 10^{-6} *$ | n.s                     |
| PLAG1 (TFFM0561.1)  | 15.2%         | 17.7%      | 16.9%      | $p < 10^{-6} *$         | $p < 10^{-6} *$ | n.s                     |
| PRDM14 (TFFM0987.1) | 41.5%         | 44.5%      | 44.2%      | $p < 10^{-6} *$         | $p < 10^{-6} *$ | n.s                     |
| RFX3 (TFFM0791.1)   | 3.8%          | 5.0%       | 4.3%       | $p < 10^{-6} *$         | n.s             | 0.000808                |
| SNAI1 (TFFM0877.1)  | 5.7%          | 4.1%       | 4.1%       | $p < 10^{-6} *$         | $p < 10^{-6} *$ | n.s                     |
| SNAI2 (TFFM0203.1)  | 13.5%         | 11.5%      | 11.4%      | $p < 10^{-6} *$         | $p < 10^{-6} *$ | n.s                     |
| SOX3 (TFFM0734.1)   | 8.3%          | 7.6%       | 7.1%       | 0.002438                | $p < 10^{-6} *$ | n.s                     |
| SP1 (TFFM0097.2)    | 39.2%         | 37.9%      | 36.8%      | n.s                     | $p < 10^{-6} *$ | n.s                     |
| SP5 (TFFM0985.1)    | 4.6%          | 3.4%       | 4.1%       | $p < 10^{-6} *$         | 0.002486        | 0.004002                |
| SPI1 (TFFM0099.1)   | 20.0%         | 18.1%      | 20.1%      | $p < 10^{-6} *$         | n.s             | $4.70 \times 10^{-5} *$ |
| SPIB (TFFM0204.1)   | 15.0%         | 13.7%      | 16.0%      | $5.60 \times 10^{-5} *$ | 0.001336        | $p < 10^{-6} *$         |
| SPIB (TFFM0204.2)   | 11.8%         | 9.8%       | 10.9%      | $p < 10^{-6} *$         | 0.002175        | 0.001131                |
| STAT2 (TFFM0207.1)  | 5.2%          | 5.8%       | 6.2%       | 0.002084                | $p < 10^{-6} *$ | n.s                     |
| STAT2 (TFFM0593.1)  | 8.0%          | 7.1%       | 6.8%       | 0.000223                | $p < 10^{-6} *$ | n.s                     |
| TCF12 (TFFM0736.1)  | 4.1%          | 3.1%       | 3.3%       | $p < 10^{-6} *$         | $p < 10^{-6} *$ | n.s                     |
| TCF3 (TFFM0108.1)   | 25.1%         | 22.3%      | 22.3%      | $p < 10^{-6} *$         | $p < 10^{-6} *$ | n.s                     |
| TCF4 (TFFM0601.1)   | 16.1%         | 14.3%      | 14.1%      | $p < 10^{-6} *$         | $p < 10^{-6} *$ | n.s                     |
| TEAD2 (TFFM0153.1)  | 8.9%          | 10.2%      | 9.5%       | $p < 10^{-6} *$         | 0.015357        | 0.019089                |
| TFAP2A (TFFM0112.1) | 13.3%         | 11.3%      | 12.9%      | $p < 10^{-6} *$         | n.s             | $8.70 \times 10^{-5} *$ |
| TFAP2B (TFFM0114.1) | 11.3%         | 9.5%       | 11.7%      | $p < 10^{-6} *$         | n.s             | $p < 10^{-6} *$         |
| TFE3 (TFFM0798.1)   | 7.8%          | 9.0%       | 8.9%       | $p < 10^{-6} *$         | $p < 10^{-6} *$ | n.s                     |
| TFEB (TFFM0768.1)   | 13.5%         | 15.2%      | 15.2%      | $p < 10^{-6} *$         | $p < 10^{-6} *$ | n.s                     |
| THAP11 (TFFM0608.1) | 2.3%          | 2.8%       | 3.1%       | 0.000171                | $p < 10^{-6} *$ | n.s                     |
| VSX2 (TFFM0775.1)   | 5.5%          | 4.4%       | 4.8%       | $p < 10^{-6} *$         | 0.000384        | n.s                     |
| YY1 (TFFM0124.1)    | 11.2%         | 13.2%      | 13.3%      | $p < 10^{-6} *$         | $p < 10^{-6} *$ | n.s                     |
| YY1 (TFFM0714.1)    | 6.2%          | 7.6%       | 7.9%       | $p < 10^{-6} *$         | $p < 10^{-6} *$ | n.s                     |
| YY2 (TFFM0621.2)    | 17.5%         | 19.7%      | 19.2%      | $p < 10^{-6} *$         | $p < 10^{-6} *$ | n.s                     |
| ZBTB6 (TFFM0624.1)  | 32.7%         | 30.6%      | 30.2%      | $p < 10^{-6} *$         | $p < 10^{-6} *$ | n.s                     |
| ZFP42 (TFFM0695.1)  | 9.3%          | 12.0%      | 10.7%      | $p < 10^{-6} *$         | $p < 10^{-6} *$ | 0.000105                |
| ZIM3 (TFFM0908.1)   | 3.2%          | 2.2%       | 2.2%       | $p < 10^{-6} *$         | $p < 10^{-6} *$ | n.s                     |
| ZNF135 (TFFM0632.1) | 16.9%         | 15.5%      | 15.1%      | $4.50 \times 10^{-5} *$ | $p < 10^{-6} *$ | n.s                     |
| ZNF341 (TFFM0700.1) | 14.4%         | 12.5%      | 12.5%      | $p < 10^{-6} *$         | $p < 10^{-6} *$ | n.s                     |
| ZNF417 (TFFM0920.1) | 13.7%         | 15.7%      | 14.7%      | $p < 10^{-6} *$         | 0.002549        | 0.007461                |
| ZNF708 (TFFM0923.1) | 5.2%          | 6.5%       | 5.9%       | $p < 10^{-6} *$         | 0.000448        | 0.013277                |
| ZNF816 (TFFM0914.1) | 10.6%         | 10.2%      | 9.3%       | n.s                     | $p < 10^{-6} *$ | 0.009962                |
| ZNF93 (TFFM0916.1)  | 19.7%         | 20.5%      | 21.6%      | n.s                     | $p < 10^{-6} *$ | 0.008743                |
| ATF1 (TFFM0002.1)   | 13.1%         | 14.6%      | 14.2%      | $p < 10^{-6} *$         | 0.000141        | n.s                     |
| CTCF (TFFM0014.1)   | 29.7%         | 31.6%      | 30.6%      | $p < 10^{-6} *$         | n.s             | n.s                     |
| E2F1 (TFFM0016.1)   | 13.7%         | 14.7%      | 15.2%      | 0.000645                | $p < 10^{-6} *$ | n.s                     |
| ELF1 (TFFM0022.2)   | 13.5%         | 12.1%      | 11.9%      | $p < 10^{-6} *$         | $p < 10^{-6} *$ | n.s                     |
| ETV4 (TFFM0173.2)   | 14.7%         | 13.1%      | 13.5%      | $p < 10^{-6} *$         | 0.000197        | n.s                     |

Continued on next page

**Table 3 – continued from previous page**

| <b>TFBS</b>          | <b>type 0</b> | <b>UHP</b> | <b>DHP</b> | <b>0 vs. UHP</b>        | <b>0 vs DHP</b>         | <b>UHP vs. DHP</b>      |
|----------------------|---------------|------------|------------|-------------------------|-------------------------|-------------------------|
| ETV4 (TFFM0784.1)    | 11.7%         | 10.5%      | 10.4%      | $3.80 \times 10^{-5} *$ | $p < 10^{-6} *$         | n.s                     |
| HSF1 (TFFM0048.1)    | 4.4%          | 5.3%       | 5.0%       | $p < 10^{-6} *$         | 0.000447                | n.s                     |
| JUND (TFFM0054.1)    | 4.5%          | 5.5%       | 5.3%       | $p < 10^{-6} *$         | $1.30 \times 10^{-5} *$ | n.s                     |
| KLF15 (TFFM0515.1)   | 34.1%         | 33.8%      | 32.0%      | n.s                     | $p < 10^{-6} *$         | 0.001070                |
| RFX1 (TFFM0733.1)    | 6.6%          | 7.8%       | 7.5%       | $p < 10^{-6} *$         | $9.80 \times 10^{-5}$   | n.s                     |
| SP4 (TFFM0591.1)     | 26.5%         | 25.8%      | 24.6%      | n.s                     | $p < 10^{-6} *$         | n.s                     |
| TFCP2L1 (TFFM0719.1) | 17.7%         | 16.2%      | 17.4%      | $p < 10^{-6} *$         | n.s                     | 0.004856                |
| ZIC3 (TFFM0771.1)    | 17.7%         | 19.4%      | 18.3%      | $p < 10^{-6} *$         | n.s                     | 0.008155                |
| ZNF75D (TFFM0647.1)  | 34.4%         | 34.2%      | 32.3%      | n.s                     | $p < 10^{-6} *$         | 0.000751                |
| NFYA (TFFM0074.2)    | 8.4%          | 8.4%       | 9.6%       | n.s                     | $p < 10^{-6} *$         | 0.000330                |
| PPARG (TFFM0086.1)   | 8.4%          | 9.4%       | 9.6%       | $3.70 \times 10^{-5} *$ | $p < 10^{-6} *$         | n.s                     |
| SOX9 (TFFM0710.1)    | 2.8%          | 2.1%       | 2.4%       | $p < 10^{-6} *$         | n.s                     | n.s                     |
| SPI1 (TFFM0713.1)    | 14.7%         | 13.2%      | 14.2%      | $p < 10^{-6} *$         | n.s                     | 0.009807                |
| TBR1 (TFFM0792.1)    | 1.7%          | 1.4%       | 1.2%       | n.s                     | $p < 10^{-6} *$         | n.s                     |
| USF2 (TFFM0123.2)    | 10.8%         | 12.2%      | 11.7%      | $p < 10^{-6} *$         | 0.000614                | n.s                     |
| ESRRG (TFFM0753.1)   | 2.3%          | 1.7%       | 1.9%       | $p < 10^{-6} *$         | n.s                     | n.s                     |
| HOXC9 (TFFM0047.2)   | 5.8%          | 5.0%       | 4.8%       | 0.000209                | $p < 10^{-6} *$         | n.s                     |
| NR5A1 (TFFM0871.1)   | 3.0%          | 2.3%       | 2.5%       | $p < 10^{-6} *$         | n.s                     | n.s                     |
| FOXH1 (TFFM0037.1)   | 1.9%          | 1.4%       | 1.5%       | $p < 10^{-6} *$         | n.s                     | n.s                     |
| TFAP2C (TFFM0211.1)  | 10.1%         | 9.7%       | 8.9%       | n.s                     | $p < 10^{-6} *$         | 0.008757                |
| ZNF684 (TFFM0646.1)  | 1.5%          | 1.9%       | 2.0%       | n.s                     | $p < 10^{-6} *$         | n.s                     |
| IRF4 (TFFM0182.1)    | 6.1%          | 5.2%       | 5.5%       | $p < 10^{-6} *$         | 0.000962                | n.s                     |
| PRDM4 (TFFM0688.1)   | 7.8%          | 9.0%       | 8.6%       | $p < 10^{-6} *$         | 0.002101                | n.s                     |
| TCF12 (TFFM0899.1)   | 11.8%         | 11.4%      | 10.5%      | n.s                     | $p < 10^{-6} *$         | 0.008528                |
| FLI1 (TFFM0031.1)    | 31.6%         | 29.7%      | 31.9%      | $p < 10^{-6} *$         | n.s                     | $5.90 \times 10^{-5} *$ |
| NR2C2 (TFFM0079.1)   | 3.8%          | 3.4%       | 3.0%       | n.s                     | $p < 10^{-6} *$         | n.s                     |
| BHLHE40 (TFFM0007.1) | 13.1%         | 14.5%      | 14.1%      | $p < 10^{-6} *$         | 0.001466                | n.s                     |
| RFX1 (TFFM0089.1)    | 5.6%          | 6.6%       | 6.0%       | $1.10 \times 10^{-5} *$ | n.s                     | 0.028718                |
| TRPS1 (TFFM0980.1)   | 22.1%         | 23.7%      | 23.8%      | $2.30 \times 10^{-5} *$ | $1.40 \times 10^{-5} *$ | n.s                     |
| CREB1 (TFFM0705.1)   | 8.0%          | 9.1%       | 8.8%       | $1.50 \times 10^{-5} *$ | 0.000364                | n.s                     |
| IRF9 (TFFM0757.1)    | 6.3%          | 5.4%       | 5.4%       | $2.10 \times 10^{-5} *$ | $1.50 \times 10^{-5} *$ | n.s                     |
| MSGN1 (TFFM0862.1)   | 9.7%          | 8.6%       | 9.6%       | $1.50 \times 10^{-5} *$ | n.s                     | 0.003044                |
| TFAP2A (TFFM0111.2)  | 21.0%         | 19.5%      | 20.0%      | $1.50 \times 10^{-5} *$ | n.s                     | n.s                     |
| ESRRA (TFFM0028.1)   | 5.7%          | 6.7%       | 5.8%       | $1.60 \times 10^{-5} *$ | n.s                     | 0.001858                |
| HOXB13 (TFFM0180.2)  | 2.2%          | 2.0%       | 1.7%       | n.s                     | $1.70 \times 10^{-5} *$ | n.s                     |
| GATA1 (TFFM0040.1)   | 3.7%          | 4.5%       | 4.2%       | $1.80 \times 10^{-5} *$ | n.s                     | n.s                     |
| TCF4 (TFFM0601.2)    | 23.2%         | 21.7%      | 21.6%      | $7.30 \times 10^{-5} *$ | $1.80 \times 10^{-5} *$ | n.s                     |
| MZF1 (TFFM0531.2)    | 5.2%          | 6.1%       | 5.4%       | $1.90 \times 10^{-5} *$ | n.s                     | 0.007048                |
| MAFK (TFFM0058.3)    | 8.5%          | 7.5%       | 7.5%       | $2.10 \times 10^{-5} *$ | $5.30 \times 10^{-5} *$ | n.s                     |
| THRB (TFFM0885.1)    | 2.0%          | 1.9%       | 1.5%       | n.s                     | $2.10 \times 10^{-5} *$ | n.s                     |
| KLF4 (TFFM0056.2)    | 35.1%         | 35.3%      | 33.3%      | n.s                     | $2.20 \times 10^{-5} *$ | 0.000394                |
| USF2 (TFFM0123.1)    | 12.3%         | 13.5%      | 12.8%      | $2.40 \times 10^{-5} *$ | n.s                     | 0.032162                |
| KLF6 (TFFM0518.1)    | 19.4%         | 20.9%      | 20.5%      | $2.50 \times 10^{-5} *$ | 0.001505                | n.s                     |
| ZNF317 (TFFM0639.1)  | 3.4%          | 3.8%       | 4.1%       | n.s                     | $2.60 \times 10^{-5} *$ | n.s                     |

Continued on next page

**Table 3 – continued from previous page**

| <b>TFBS</b>          | <b>type 0</b> | <b>UHP</b> | <b>DHP</b> | <b>0 vs. UHP</b>        | <b>0 vs DHP</b>         | <b>UHP vs. DHP</b>      |
|----------------------|---------------|------------|------------|-------------------------|-------------------------|-------------------------|
| OVOL2 (TFFM0548.1)   | 1.4%          | 1.9%       | 1.3%       | n.s                     | n.s                     | $2.70 \times 10^{-5} *$ |
| RFX1 (TFFM0089.2)    | 6.5%          | 7.5%       | 7.1%       | $2.70 \times 10^{-5} *$ | 0.008550                | n.s                     |
| AR (TFFM0001.1)      | 20.1%         | 18.7%      | 19.8%      | $2.80 \times 10^{-5} *$ | n.s                     | 0.011240                |
| JUNB (TFFM0829.1)    | 1.8%          | 2.3%       | 2.2%       | $2.90 \times 10^{-5} *$ | n.s                     | n.s                     |
| MITF (TFFM0141.1)    | 10.8%         | 12.0%      | 11.3%      | $3.50 \times 10^{-5} *$ | n.s                     | 0.043905                |
| TBX20 (TFFM0766.1)   | 10.0%         | 10.1%      | 8.9%       | n.s                     | $3.50 \times 10^{-5} *$ | 0.000815                |
| USF1 (TFFM0122.1)    | 14.1%         | 15.4%      | 14.7%      | $3.50 \times 10^{-5} *$ | n.s                     | n.s                     |
| NR3C1 (TFFM0080.1)   | 6.7%          | 5.8%       | 5.9%       | $3.70 \times 10^{-5} *$ | $5.90 \times 10^{-5} *$ | n.s                     |
| HSF2 (TFFM0786.1)    | 6.9%          | 7.8%       | 7.8%       | $9.60 \times 10^{-5}$   | $3.90 \times 10^{-5} *$ | n.s                     |
| PRDM1 (TFFM0087.2)   | 4.9%          | 4.9%       | 4.2%       | n.s                     | $4.10 \times 10^{-5} *$ | 0.002962                |
| HNF1A (TFFM0989.1)   | 16.8%         | 17.3%      | 18.1%      | n.s                     | $4.30 \times 10^{-5} *$ | n.s                     |
| OTX2 (TFFM0197.1)    | 3.2%          | 2.7%       | 2.6%       | n.s                     | $4.40 \times 10^{-5} *$ | n.s                     |
| ERF (TFFM0476.1)     | 17.2%         | 15.9%      | 16.8%      | $4.70 \times 10^{-5} *$ | n.s                     | 0.021609                |
| KLF1 (TFFM0055.1)    | 19.5%         | 20.4%      | 18.6%      | n.s                     | n.s                     | $4.90 \times 10^{-5} *$ |
| ZBTB7B (TFFM0770.1)  | 5.3%          | 6.1%       | 5.8%       | $5.40 \times 10^{-5} *$ | 0.007816                | n.s                     |
| STAT3 (TFFM0102.1)   | 10.4%         | 10.8%      | 9.3%       | n.s                     | 0.000102                | $6.30 \times 10^{-5} *$ |
| KLF4 (TFFM0056.3)    | 36.7%         | 38.0%      | 35.8%      | n.s                     | n.s                     | $6.80 \times 10^{-5} *$ |
| IRF2 (TFFM0181.1)    | 3.6%          | 3.4%       | 3.0%       | n.s                     | $6.90 \times 10^{-5} *$ | n.s                     |
| MAFG (TFFM0188.2)    | 5.7%          | 4.9%       | 5.0%       | $7.00 \times 10^{-5} *$ | 0.001299                | n.s                     |
| NR5A2 (TFFM0731.1)   | 2.9%          | 2.4%       | 2.4%       | 0.000255                | $7.90 \times 10^{-5} *$ | n.s                     |
| MAZ (TFFM0524.1)     | 10.1%         | 11.2%      | 10.8%      | $8.00 \times 10^{-5} *$ | 0.011105                | n.s                     |
| ESRRB (TFFM0029.1)   | 3.8%          | 3.2%       | 3.3%       | $8.40 \times 10^{-5} *$ | 0.000604                | n.s                     |
| MAFF (TFFM0057.2)    | 4.8%          | 4.8%       | 5.6%       | n.s                     | $9.10 \times 10^{-5} *$ | 0.000954                |
| ATF7 (TFFM0164.1)    | 6.1%          | 6.9%       | 6.5%       | $9.80 \times 10^{-5}$   | n.s                     | n.s                     |
| CREB1 (TFFM0012.1)   | 16.7%         | 17.7%      | 18.0%      | 0.002328                | $9.80 \times 10^{-5}$   | n.s                     |
| CEBPG (TFFM0893.1)   | 7.7%          | 8.3%       | 8.7%       | 0.010044                | 0.000103                | n.s                     |
| LHX2 (TFFM0185.2)    | 3.6%          | 3.0%       | 3.3%       | 0.000104                | n.s                     | n.s                     |
| CDX2 (TFFM0008.2)    | 4.1%          | 4.8%       | 4.6%       | 0.000110                | n.s                     | n.s                     |
| ZEB1 (TFFM0127.1)    | 26.7%         | 25.2%      | 25.8%      | 0.000112                | n.s                     | n.s                     |
| TFAP2C (TFFM0793.1)  | 21.7%         | 22.8%      | 23.1%      | n.s                     | 0.000114                | n.s                     |
| SCRT1 (TFFM0580.2)   | 10.0%         | 9.1%       | 9.0%       | 0.000356                | 0.000116                | n.s                     |
| RELB (TFFM0575.1)    | 4.3%          | 3.8%       | 3.7%       | 0.002573                | 0.000125                | n.s                     |
| FOXO3 (TFFM0488.1)   | 13.3%         | 12.2%      | 12.2%      | 0.000148                | 0.000258                | n.s                     |
| ZKSCAN1 (TFFM0630.1) | 2.5%          | 2.9%       | 3.0%       | n.s                     | 0.000150                | n.s                     |
| SPI1 (TFFM0099.2)    | 13.9%         | 12.7%      | 14.0%      | 0.000157                | n.s                     | 0.001355                |
| KLF12 (TFFM0514.1)   | 26.2%         | 26.7%      | 24.8%      | n.s                     | 0.000159                | 0.000221                |
| HOXD13 (TFFM0808.1)  | 8.2%          | 8.9%       | 7.7%       | 0.004871                | 0.015241                | 0.000164                |
| NEUROD2 (TFFM0990.1) | 10.2%         | 10.3%      | 11.2%      | n.s                     | 0.000170                | 0.007087                |
| ERG (TFFM0725.1)     | 21.6%         | 20.3%      | 21.7%      | 0.000175                | n.s                     | 0.002476                |
| THAP11 (TFFM0883.1)  | 13.4%         | 12.3%      | 13.1%      | 0.000185                | n.s                     | 0.020255                |
| MYF5 (TFFM0676.1)    | 17.3%         | 16.1%      | 16.4%      | 0.000191                | n.s                     | n.s                     |
| ZSCAN29 (TFFM0648.1) | 8.1%          | 7.3%       | 7.3%       | 0.000307                | 0.000199                | n.s                     |
| JUN (TFFM0050.1)     | 10.9%         | 12.0%      | 11.4%      | 0.000214                | n.s                     | n.s                     |
| SRF (TFFM0100.1)     | 4.7%          | 5.4%       | 4.5%       | 0.000215                | n.s                     | 0.000642                |

Continued on next page



**Table 3 – continued from previous page**

| <b>TFBS</b>          | <b>type 0</b> | <b>UHP</b> | <b>DHP</b> | <b>0 vs. UHP</b> | <b>0 vs DHP</b> | <b>UHP vs. DHP</b> |
|----------------------|---------------|------------|------------|------------------|-----------------|--------------------|
| EGR1 (TFFM0020.2)    | 23.0%         | 24.4%      | 23.0%      | 0.000219         | n.s             | 0.002962           |
| GATA4 (TFFM0043.1)   | 4.7%          | 5.5%       | 5.3%       | 0.000221         | 0.001686        | n.s                |
| PAX5 (TFFM0084.2)    | 17.6%         | 18.9%      | 18.5%      | 0.000228         | 0.005266        | n.s                |
| ZNF692 (TFFM0984.1)  | 14.5%         | 14.2%      | 13.4%      | n.s              | 0.000228        | 0.030029           |
| GATA6 (TFFM0137.2)   | 5.6%          | 6.4%       | 6.2%       | 0.000246         | 0.003164        | n.s                |
| CTCF (TFFM0133.1)    | 22.6%         | 23.9%      | 23.9%      | 0.000345         | 0.000255        | n.s                |
| USF2 (TFFM0738.1)    | 9.6%          | 10.6%      | 10.4%      | 0.000258         | 0.003336        | n.s                |
| ZIC2 (TFFM0628.1)    | 3.0%          | 2.4%       | 2.5%       | 0.000260         | n.s             | n.s                |
| NFIC (TFFM0863.1)    | 8.7%          | 9.3%       | 8.1%       | 0.007537         | 0.018181        | 0.000281           |
| NFE2L2 (TFFM0071.1)  | 6.9%          | 7.7%       | 7.6%       | 0.000285         | 0.000627        | n.s                |
| RUNX3 (TFFM0093.1)   | 5.5%          | 5.9%       | 5.0%       | n.s              | 0.006045        | 0.000297           |
| SP1 (TFFM0097.1)     | 23.5%         | 24.3%      | 22.5%      | n.s              | n.s             | 0.000302           |
| ZBTB7A (TFFM0126.2)  | 22.1%         | 21.4%      | 20.9%      | n.s              | 0.000310        | n.s                |
| MAFK (TFFM0058.2)    | 5.7%          | 5.1%       | 6.0%       | 0.001346         | n.s             | 0.000328           |
| CTCF (TFFM0461.1)    | 20.5%         | 21.8%      | 20.2%      | 0.000337         | n.s             | 0.000580           |
| BHLHA15 (TFFM0856.1) | 7.7%          | 6.9%       | 7.1%       | 0.000339         | 0.004142        | n.s                |
| KLF5 (TFFM0183.1)    | 26.3%         | 26.4%      | 24.9%      | n.s              | 0.000345        | 0.003945           |
| NFATC1 (TFFM0751.1)  | 6.8%          | 7.6%       | 7.1%       | 0.000352         | n.s             | 0.036032           |
| NR6A1 (TFFM0544.1)   | 7.9%          | 7.0%       | 7.1%       | 0.000352         | 0.000794        | n.s                |
| TFAP2C (TFFM0117.1)  | 13.8%         | 12.8%      | 13.8%      | 0.000355         | n.s             | 0.005043           |
| STAT6 (TFFM0105.1)   | 9.3%          | 10.3%      | 9.9%       | 0.000395         | 0.018147        | n.s                |
| ZNF257 (TFFM0909.1)  | 19.8%         | 21.0%      | 20.6%      | 0.000395         | n.s             | n.s                |
| SOX17 (TFFM0587.1)   | 16.0%         | 15.6%      | 14.9%      | n.s              | 0.000399        | n.s                |
| IRF1 (TFFM0708.1)    | 3.8%          | 3.5%       | 3.2%       | n.s              | 0.000404        | n.s                |
| MAFB (TFFM0187.1)    | 4.8%          | 5.1%       | 5.5%       | n.s              | 0.000430        | n.s                |
| MYOD1 (TFFM0068.2)   | 14.0%         | 12.9%      | 13.4%      | 0.000431         | n.s             | n.s                |
| TBX19 (TFFM0597.1)   | 15.8%         | 14.7%      | 14.7%      | 0.001034         | 0.000437        | n.s                |
| MAFG (TFFM0188.1)    | 6.0%          | 5.9%       | 6.8%       | n.s              | 0.000453        | 0.001107           |
| MXI1 (TFFM0142.1)    | 6.6%          | 7.4%       | 7.2%       | 0.000481         | 0.007622        | n.s                |
| NR2C1 (TFFM0542.1)   | 4.2%          | 4.3%       | 3.6%       | n.s              | 0.000486        | 0.003941           |
| ZNF549 (TFFM0921.1)  | 20.2%         | 21.3%      | 21.4%      | 0.002466         | 0.000489        | n.s                |
| SPDEF (TFFM0592.1)   | 8.2%          | 8.1%       | 7.4%       | n.s              | 0.000528        | 0.019320           |
| TCF7 (TFFM0209.2)    | 6.4%          | 6.8%       | 7.1%       | n.s              | 0.000531        | n.s                |
| RFX3 (TFFM0577.1)    | 7.2%          | 8.0%       | 7.7%       | 0.000532         | 0.010058        | n.s                |
| TBP (TFFM0106.1)     | 5.3%          | 5.9%       | 6.0%       | 0.007525         | 0.000569        | n.s                |
| PTF1A (TFFM0567.1)   | 17.6%         | 16.7%      | 16.5%      | n.s              | 0.000584        | n.s                |
| ZNF189 (TFFM0918.1)  | 19.7%         | 20.1%      | 18.6%      | n.s              | 0.000700        | 0.000628           |
| MAFF (TFFM0057.1)    | 12.6%         | 11.6%      | 12.3%      | 0.000651         | n.s             | 0.042332           |
| HOXD13 (TFFM0506.1)  | 8.8%          | 9.7%       | 8.9%       | 0.000717         | n.s             | 0.016009           |
| SCRT1 (TFFM0580.1)   | 9.9%          | 9.1%       | 9.0%       | 0.001167         | 0.000721        | n.s                |
| SREBF1 (TFFM0797.1)  | 5.3%          | 5.1%       | 5.9%       | n.s              | 0.000730        | 0.002175           |
| FOXJ2 (TFFM0175.1)   | 14.1%         | 13.6%      | 13.1%      | n.s              | 0.000747        | n.s                |
| SNAI2 (TFFM0203.2)   | 6.0%          | 5.3%       | 5.8%       | 0.000762         | n.s             | n.s                |
| RBPJ (TFFM0149.1)    | 6.0%          | 5.3%       | 5.7%       | 0.000772         | n.s             | n.s                |

Continued on next page

**Table 3 – continued from previous page**

| <b>TFBS</b>          | <b>type 0</b> | <b>UHP</b> | <b>DHP</b> | <b>0 vs. UHP</b> | <b>0 vs DHP</b> | <b>UHP vs. DHP</b> |
|----------------------|---------------|------------|------------|------------------|-----------------|--------------------|
| USF2 (TFFM0123.3)    | 10.3%         | 11.1%      | 11.2%      | 0.002157         | 0.000773        | n.s                |
| ZBTB26 (TFFM0623.1)  | 18.7%         | 18.5%      | 19.8%      | n.s              | 0.000785        | 0.002750           |
| GATA2 (TFFM0041.2)   | 3.8%          | 4.4%       | 4.4%       | 0.000835         | 0.001841        | n.s                |
| NFATC2 (TFFM0720.1)  | 19.0%         | 19.1%      | 20.1%      | n.s              | 0.000911        | 0.017779           |
| PKNOX1 (TFFM0560.2)  | 4.2%          | 3.7%       | 4.5%       | n.s              | n.s             | 0.000981           |
| MAF (TFFM0523.1)     | 24.1%         | 22.9%      | 23.8%      | 0.000984         | n.s             | n.s                |
| ZNF281 (TFFM0637.1)  | 18.3%         | 19.4%      | 19.3%      | 0.001003         | 0.001663        | n.s                |
| TBX5 (TFFM0599.1)    | 4.5%          | 5.1%       | 4.6%       | 0.001016         | n.s             | 0.017567           |
| MEIS1 (TFFM0894.1)   | 5.1%          | 4.5%       | 4.7%       | 0.001044         | n.s             | n.s                |
| ZNF652 (TFFM0702.1)  | 5.3%          | 5.9%       | 5.7%       | 0.001052         | n.s             | n.s                |
| TFAP2C (TFFM0118.1)  | 16.4%         | 17.5%      | 17.0%      | 0.001085         | n.s             | n.s                |
| SOX10 (TFFM0152.1)   | 13.0%         | 12.1%      | 12.1%      | 0.001363         | 0.001096        | n.s                |
| TP63 (TFFM0120.1)    | 8.0%          | 8.8%       | 8.2%       | 0.001129         | n.s             | 0.030882           |
| MEF2B (TFFM0189.1)   | 12.1%         | 13.0%      | 12.2%      | 0.001134         | n.s             | 0.025587           |
| NR2F1 (TFFM0194.1)   | 3.5%          | 3.6%       | 3.0%       | n.s              | 0.001255        | 0.008668           |
| ELF1 (TFFM0022.1)    | 18.7%         | 17.6%      | 17.8%      | 0.001298         | n.s             | n.s                |
| NFYA (TFFM0074.1)    | 3.2%          | 2.9%       | 3.5%       | n.s              | n.s             | 0.001303           |
| ZNF449 (TFFM0701.1)  | 19.2%         | 19.7%      | 18.2%      | n.s              | n.s             | 0.001344           |
| EBF1 (TFFM0019.2)    | 4.9%          | 4.5%       | 5.2%       | n.s              | n.s             | 0.001498           |
| MLX (TFFM0527.1)     | 4.4%          | 4.5%       | 5.0%       | n.s              | 0.001559        | n.s                |
| ZBTB18 (TFFM0622.1)  | 14.2%         | 13.2%      | 13.6%      | 0.001605         | n.s             | n.s                |
| ISL1 (TFFM0512.1)    | 13.8%         | 12.9%      | 13.8%      | 0.001675         | n.s             | 0.012928           |
| HNF4G (TFFM0046.1)   | 4.0%          | 3.4%       | 3.8%       | 0.001676         | n.s             | n.s                |
| ELK4 (TFFM0024.1)    | 13.2%         | 12.9%      | 14.1%      | n.s              | 0.003207        | 0.001687           |
| NEUROD2 (TFFM0760.1) | 14.7%         | 13.7%      | 14.6%      | 0.001714         | n.s             | 0.028355           |
| GATA1 (TFFM0040.2)   | 3.8%          | 4.4%       | 4.2%       | 0.001775         | n.s             | n.s                |
| PRDM1 (TFFM0087.3)   | 9.6%          | 10.1%      | 9.0%       | 0.028021         | 0.026310        | 0.001798           |
| ELF5 (TFFM0718.1)    | 17.0%         | 16.0%      | 16.2%      | 0.001855         | n.s             | n.s                |
| SMAD4 (TFFM0151.1)   | 3.7%          | 4.0%       | 4.2%       | n.s              | 0.001878        | n.s                |
| SP9 (TFFM0878.1)     | 3.9%          | 3.4%       | 3.8%       | 0.001881         | n.s             | n.s                |
| ZNF343 (TFFM0910.1)  | 12.6%         | 13.5%      | 13.3%      | 0.001959         | 0.005886        | n.s                |
| NEUROD2 (TFFM0533.1) | 13.3%         | 12.4%      | 13.1%      | 0.002018         | n.s             | 0.047582           |
| POU2F2 (TFFM0085.1)  | 12.4%         | 11.9%      | 11.6%      | n.s              | 0.002080        | n.s                |
| TCF12 (TFFM0107.1)   | 15.5%         | 14.6%      | 14.7%      | 0.002230         | 0.006327        | n.s                |
| FOXJ3 (TFFM0801.1)   | 9.9%          | 9.3%       | 9.2%       | 0.011124         | 0.002298        | n.s                |
| EHF (TFFM0471.2)     | 17.9%         | 17.6%      | 18.9%      | n.s              | 0.002397        | 0.003895           |
| OLIG2 (TFFM0763.1)   | 6.0%          | 5.5%       | 5.4%       | 0.008476         | 0.002543        | n.s                |
| YY2 (TFFM0621.1)     | 11.5%         | 12.3%      | 11.8%      | 0.002661         | n.s             | n.s                |
| RFX5 (TFFM0090.1)    | 6.2%          | 6.8%       | 6.8%       | 0.002692         | 0.004805        | n.s                |
| CREB5 (TFFM0800.1)   | 4.3%          | 4.8%       | 4.7%       | 0.002748         | n.s             | n.s                |
| TFAP2B (TFFM0115.1)  | 15.4%         | 15.1%      | 16.3%      | n.s              | 0.004641        | 0.002827           |
| MAFG (TFFM0759.1)    | 10.8%         | 10.0%      | 10.5%      | 0.002829         | n.s             | n.s                |
| MEIS1 (TFFM0062.1)   | 10.5%         | 11.3%      | 10.9%      | 0.002831         | n.s             | n.s                |
| TCF3 (TFFM0737.1)    | 11.9%         | 11.4%      | 11.1%      | n.s              | 0.002893        | n.s                |

Continued on next page

**Table 3 – continued from previous page**

| <b>TFBS</b>          | <b>type 0</b> | <b>UHP</b> | <b>DHP</b> | <b>0 vs. UHP</b> | <b>0 vs DHP</b> | <b>UHP vs. DHP</b> |
|----------------------|---------------|------------|------------|------------------|-----------------|--------------------|
| SP2 (TFFM0098.2)     | 15.6%         | 14.6%      | 14.8%      | 0.003062         | 0.009185        | n.s                |
| ELF5 (TFFM0473.1)    | 24.0%         | 23.0%      | 24.4%      | n.s              | n.s             | 0.003274           |
| TBX6 (TFFM0880.1)    | 12.1%         | 12.5%      | 13.0%      | n.s              | 0.003319        | n.s                |
| PTF1A (TFFM0888.1)   | 9.6%          | 9.0%       | 8.9%       | 0.011872         | 0.003373        | n.s                |
| ELF3 (TFFM0170.1)    | 12.8%         | 12.0%      | 12.0%      | 0.003439         | 0.004782        | n.s                |
| TFCP2 (TFFM0604.1)   | 8.8%          | 9.2%       | 9.6%       | n.s              | 0.003589        | n.s                |
| REL (TFFM0715.1)     | 13.5%         | 13.8%      | 14.4%      | n.s              | 0.003612        | n.s                |
| WT1 (TFFM0620.1)     | 4.3%          | 4.6%       | 3.9%       | n.s              | n.s             | 0.004064           |
| ERG (TFFM0025.1)     | 24.0%         | 22.8%      | 24.2%      | n.s              | n.s             | 0.004167           |
| POU2F1 (TFFM0788.1)  | 13.6%         | 12.7%      | 13.2%      | 0.004268         | n.s             | n.s                |
| SOX17 (TFFM0711.1)   | 4.9%          | 4.7%       | 5.4%       | n.s              | n.s             | 0.004549           |
| FOXA1 (TFFM0035.1)   | 11.7%         | 11.2%      | 10.9%      | n.s              | 0.004596        | n.s                |
| DLX5 (TFFM0857.1)    | 7.2%          | 7.0%       | 6.6%       | n.s              | 0.004615        | n.s                |
| ETV2 (TFFM0479.1)    | 25.0%         | 23.8%      | 25.2%      | n.s              | n.s             | 0.004648           |
| CEBPD (TFFM0011.1)   | 13.3%         | 12.9%      | 12.5%      | n.s              | 0.005008        | n.s                |
| POU5F1 (TFFM0148.1)  | 10.6%         | 11.3%      | 11.2%      | 0.005319         | 0.012313        | n.s                |
| TEAD1 (TFFM0210.1)   | 6.0%          | 5.6%       | 6.3%       | n.s              | n.s             | 0.006337           |
| MYCN (TFFM0067.2)    | 12.8%         | 13.6%      | 13.5%      | 0.006348         | 0.014029        | n.s                |
| ZBTB7A (TFFM0126.1)  | 5.3%          | 5.9%       | 5.7%       | 0.006676         | n.s             | n.s                |
| PKNOX1 (TFFM0560.1)  | 5.3%          | 4.8%       | 5.4%       | 0.006826         | n.s             | 0.008376           |
| OLIG2 (TFFM0991.1)   | 3.8%          | 3.6%       | 4.2%       | n.s              | n.s             | 0.006938           |
| BCL6 (TFFM0006.2)    | 7.0%          | 7.6%       | 7.0%       | 0.007097         | n.s             | 0.029799           |
| GF11B (TFFM0044.1)   | 7.9%          | 7.3%       | 7.3%       | 0.008345         | 0.007182        | n.s                |
| MYCN (TFFM0067.1)    | 8.5%          | 7.9%       | 8.0%       | 0.007806         | 0.017610        | n.s                |
| RFX3 (TFFM0577.2)    | 8.4%          | 9.0%       | 8.4%       | 0.007861         | n.s             | 0.028152           |
| CRX (TFFM0013.1)     | 10.8%         | 11.5%      | 11.1%      | 0.008212         | n.s             | n.s                |
| CRX (TFFM0723.1)     | 13.6%         | 14.4%      | 13.8%      | 0.008256         | n.s             | n.s                |
| NFIL3 (TFFM0539.1)   | 10.3%         | 11.0%      | 10.7%      | 0.008745         | n.s             | n.s                |
| BCL6B (TFFM0447.1)   | 11.6%         | 11.3%      | 10.9%      | n.s              | 0.009060        | n.s                |
| TFAP2B (TFFM0116.1)  | 14.7%         | 15.3%      | 15.5%      | n.s              | 0.009219        | n.s                |
| ZNF136 (TFFM0633.1)  | 5.5%          | 6.0%       | 5.6%       | 0.009226         | n.s             | n.s                |
| GATA2 (TFFM0041.1)   | 5.7%          | 6.3%       | 6.2%       | 0.009236         | n.s             | n.s                |
| ELK1 (TFFM0023.1)    | 13.6%         | 14.0%      | 14.4%      | n.s              | 0.009694        | n.s                |
| TCF21 (TFFM0600.1)   | 15.5%         | 14.7%      | 15.6%      | 0.010412         | n.s             | 0.019447           |
| BHLHE41 (TFFM0450.1) | 11.7%         | 12.4%      | 12.2%      | 0.010570         | n.s             | n.s                |
| MYOD1 (TFFM0068.1)   | 11.6%         | 10.9%      | 11.2%      | 0.010642         | n.s             | n.s                |
| ZNF331 (TFFM0919.1)  | 11.1%         | 10.5%      | 11.4%      | 0.021488         | n.s             | 0.011104           |
| MXI1 (TFFM0142.2)    | 5.9%          | 6.4%       | 6.2%       | 0.011695         | n.s             | n.s                |
| ATOH1 (TFFM0854.1)   | 10.5%         | 9.9%       | 9.9%       | 0.012599         | 0.012021        | n.s                |
| NFYC (TFFM0682.1)    | 5.1%          | 4.9%       | 5.5%       | n.s              | n.s             | 0.013208           |
| USF1 (TFFM0122.2)    | 11.7%         | 12.4%      | 12.1%      | 0.013422         | n.s             | n.s                |
| PBX2 (TFFM0146.1)    | 5.7%          | 5.3%       | 5.9%       | n.s              | n.s             | 0.013657           |
| RFX2 (TFFM0576.1)    | 7.0%          | 7.5%       | 7.5%       | 0.013825         | n.s             | n.s                |
| NFKB2 (TFFM0193.1)   | 9.9%          | 10.5%      | 9.7%       | 0.015750         | n.s             | 0.013931           |

Continued on next page

**Table 3 – continued from previous page**

| <b>TFBS</b>          | <b>type 0</b> | <b>UHP</b> | <b>DHP</b> | <b>0 vs. UHP</b> | <b>0 vs DHP</b> | <b>UHP vs. DHP</b> |
|----------------------|---------------|------------|------------|------------------|-----------------|--------------------|
| BACH2 (TFFM0855.1)   | 7.4%          | 7.1%       | 6.9%       | n.s              | 0.014747        | n.s                |
| THRB (TFFM0609.1)    | 10.4%         | 9.8%       | 10.1%      | 0.015256         | n.s             | n.s                |
| NFATC1 (TFFM0535.1)  | 13.7%         | 14.4%      | 14.2%      | 0.016400         | n.s             | n.s                |
| HOXA13 (TFFM0756.1)  | 5.9%          | 6.1%       | 5.5%       | n.s              | n.s             | 0.016432           |
| NFYB (TFFM0075.2)    | 7.0%          | 7.1%       | 7.5%       | n.s              | 0.017033        | n.s                |
| HEY2 (TFFM0755.1)    | 8.9%          | 9.1%       | 9.4%       | n.s              | 0.017042        | n.s                |
| NR2F6 (TFFM0776.1)   | 15.8%         | 16.3%      | 15.4%      | n.s              | n.s             | 0.019455           |
| GRHL2 (TFFM0138.1)   | 9.1%          | 9.7%       | 9.3%       | 0.020826         | n.s             | n.s                |
| TP73 (TFFM0121.1)    | 11.0%         | 11.2%      | 10.5%      | n.s              | n.s             | 0.030064           |
| SOX2 (TFFM0095.1)    | 8.8%          | 8.4%       | 9.1%       | n.s              | n.s             | 0.030714           |
| NFE2L1 (TFFM0192.1)  | 15.4%         | 15.2%      | 16.1%      | n.s              | n.s             | 0.032053           |
| ATOH1 (TFFM0004.1)   | 11.9%         | 11.6%      | 12.3%      | n.s              | n.s             | 0.032501           |
| NR2F2 (TFFM0144.1)   | 15.5%         | 15.6%      | 14.8%      | n.s              | n.s             | 0.035768           |
| EOMES (TFFM0171.1)   | 12.0%         | 11.5%      | 12.2%      | n.s              | n.s             | 0.036098           |
| IRF5 (TFFM0852.1)    | 11.2%         | 11.0%      | 11.7%      | n.s              | n.s             | 0.039727           |
| TFAP4 (TFFM0212.1)   | 9.7%          | 9.4%       | 10.0%      | n.s              | n.s             | 0.049575           |
| TWIST1 (TFFM0155.2)  | 10.2%         | 9.7%       | 10.3%      | n.s              | n.s             | 0.08               |
| ARNT (TFFM0161.1)    | 6.6%          | 6.7%       | 6.5%       | n.s              | n.s             | n.s                |
| ATF3 (TFFM0003.1)    | 11.3%         | 11.8%      | 11.6%      | n.s              | n.s             | n.s                |
| ATF4 (TFFM0163.1)    | 6.0%          | 6.4%       | 6.1%       | n.s              | n.s             | n.s                |
| BACH1 (TFFM0654.1)   | 4.7%          | 5.0%       | 4.7%       | n.s              | n.s             | n.s                |
| BACH1 (TFFM0891.1)   | 3.9%          | 4.1%       | 4.0%       | n.s              | n.s             | n.s                |
| BACH2 (TFFM0132.1)   | 6.8%          | 6.7%       | 6.6%       | n.s              | n.s             | n.s                |
| BACH2 (TFFM0132.2)   | 11.8%         | 11.4%      | 11.6%      | n.s              | n.s             | n.s                |
| BATF3 (TFFM0446.1)   | 0.5%          | 0.3%       | 0.5%       | n.s              | n.s             | n.s                |
| BATF3 (TFFM0656.1)   | 5.9%          | 5.7%       | 5.6%       | n.s              | n.s             | n.s                |
| BATF (TFFM0655.1)    | 6.7%          | 6.6%       | 6.8%       | n.s              | n.s             | n.s                |
| BHLHA15 (TFFM0449.1) | 13.1%         | 12.5%      | 13.0%      | n.s              | n.s             | n.s                |
| BHLHA15 (TFFM0745.1) | 6.5%          | 6.1%       | 6.2%       | n.s              | n.s             | n.s                |
| CDX2 (TFFM0008.1)    | 2.6%          | 2.3%       | 2.4%       | n.s              | n.s             | n.s                |
| CEBPA (TFFM0009.1)   | 8.9%          | 9.0%       | 8.9%       | n.s              | n.s             | n.s                |
| CEBPA (TFFM0009.2)   | 9.9%          | 10.1%      | 10.4%      | n.s              | n.s             | n.s                |
| CEBPB (TFFM0010.1)   | 8.8%          | 9.1%       | 8.8%       | n.s              | n.s             | n.s                |
| CEBPB (TFFM0722.1)   | 6.9%          | 7.0%       | 6.9%       | n.s              | n.s             | n.s                |
| CEBPD (TFFM0011.2)   | 10.0%         | 10.1%      | 10.3%      | n.s              | n.s             | n.s                |
| CEBPE (TFFM0455.1)   | 13.1%         | 12.9%      | 12.7%      | n.s              | n.s             | n.s                |
| CEBPE (TFFM0799.1)   | 10.0%         | 10.2%      | 9.9%       | n.s              | n.s             | n.s                |
| CEBPG (TFFM0166.1)   | 7.3%          | 7.5%       | 7.2%       | n.s              | n.s             | n.s                |
| CLOCK (TFFM0459.1)   | 12.5%         | 12.3%      | 12.0%      | n.s              | n.s             | n.s                |
| CLOCK (TFFM0795.1)   | 1.3%          | 1.2%       | 1.2%       | n.s              | n.s             | n.s                |
| CREB3L1 (TFFM0167.1) | 8.3%          | 7.9%       | 8.3%       | n.s              | n.s             | n.s                |
| CREB3L2 (TFFM0746.1) | 4.3%          | 4.4%       | 4.3%       | n.s              | n.s             | n.s                |
| CREM (TFFM0168.1)    | 13.7%         | 14.3%      | 13.9%      | n.s              | n.s             | n.s                |
| CREM (TFFM0747.1)    | 7.8%          | 7.8%       | 7.8%       | n.s              | n.s             | n.s                |

Continued on next page

**Table 3 – continued from previous page**

| <b>TFBS</b>        | <b>type 0</b> | <b>UHP</b> | <b>DHP</b> | <b>0 vs. UHP</b> | <b>0 vs DHP</b> | <b>UHP vs. DHP</b> |
|--------------------|---------------|------------|------------|------------------|-----------------|--------------------|
| CUX1 (TFFM0169.1)  | 2.2%          | 2.0%       | 2.1%       | n.s              | n.s             | n.s                |
| CUX1 (TFFM0781.1)  | 8.6%          | 8.6%       | 8.5%       | n.s              | n.s             | n.s                |
| CUX2 (TFFM0782.1)  | 3.3%          | 3.2%       | 3.1%       | n.s              | n.s             | n.s                |
| DLX1 (TFFM0804.1)  | 10.7%         | 10.2%      | 10.3%      | n.s              | n.s             | n.s                |
| DLX2 (TFFM0805.1)  | 7.9%          | 7.8%       | 7.6%       | n.s              | n.s             | n.s                |
| DMRT1 (TFFM0464.1) | 7.7%          | 8.0%       | 7.7%       | n.s              | n.s             | n.s                |
| DUX4 (TFFM0015.1)  | 2.2%          | 2.0%       | 2.1%       | n.s              | n.s             | n.s                |
| E2F4 (TFFM0017.1)  | 38.2%         | 40.1%      | 39.9%      | n.s              | n.s             | n.s                |
| E2F4 (TFFM0017.2)  | 36.1%         | 37.4%      | 36.8%      | n.s              | n.s             | n.s                |
| E2F6 (TFFM0018.1)  | 10.3%         | 10.5%      | 10.6%      | n.s              | n.s             | n.s                |
| E2F6 (TFFM0724.1)  | 11.0%         | 11.0%      | 10.5%      | n.s              | n.s             | n.s                |
| EBF1 (TFFM0019.1)  | 13.9%         | 13.5%      | 13.3%      | n.s              | n.s             | n.s                |
| EBF3 (TFFM0662.1)  | 24.8%         | 25.0%      | 24.7%      | n.s              | n.s             | n.s                |
| EGR1 (TFFM0020.1)  | 23.4%         | 24.1%      | 23.0%      | n.s              | n.s             | n.s                |
| EGR1 (TFFM0020.3)  | 16.8%         | 16.7%      | 16.3%      | n.s              | n.s             | n.s                |
| EGR2 (TFFM0021.1)  | 15.8%         | 16.4%      | 16.3%      | n.s              | n.s             | n.s                |
| EHF (TFFM0471.1)   | 17.4%         | 17.4%      | 17.2%      | n.s              | n.s             | n.s                |
| ELK3 (TFFM0474.1)  | 13.6%         | 13.3%      | 13.4%      | n.s              | n.s             | n.s                |
| ESR1 (TFFM0026.1)  | 29.9%         | 30.0%      | 30.4%      | n.s              | n.s             | n.s                |
| ESR2 (TFFM0027.1)  | 23.7%         | 23.5%      | 23.0%      | n.s              | n.s             | n.s                |
| ESRRA (TFFM0028.2) | 1.9%          | 1.8%       | 1.6%       | n.s              | n.s             | n.s                |
| ETS1 (TFFM0030.1)  | 22.2%         | 21.1%      | 22.1%      | n.s              | n.s             | n.s                |
| ETV1 (TFFM0172.1)  | 20.6%         | 19.9%      | 20.3%      | n.s              | n.s             | n.s                |
| ETV1 (TFFM0172.2)  | 35.5%         | 37.2%      | 36.0%      | n.s              | n.s             | n.s                |
| ETV5 (TFFM0480.2)  | 9.5%          | 10.0%      | 9.8%       | n.s              | n.s             | n.s                |
| FOS (TFFM0032.1)   | 8.0%          | 8.1%       | 8.1%       | n.s              | n.s             | n.s                |
| FOSL1 (TFFM0033.1) | 5.1%          | 5.4%       | 5.4%       | n.s              | n.s             | n.s                |
| FOSL1 (TFFM0033.2) | 5.3%          | 5.6%       | 5.5%       | n.s              | n.s             | n.s                |
| FOSL2 (TFFM0034.1) | 6.5%          | 6.5%       | 6.3%       | n.s              | n.s             | n.s                |
| FOXA1 (TFFM0035.2) | 3.0%          | 2.8%       | 2.7%       | n.s              | n.s             | n.s                |
| FOXA2 (TFFM0036.2) | 7.5%          | 7.3%       | 7.2%       | n.s              | n.s             | n.s                |
| FOXA3 (TFFM0667.1) | 10.8%         | 10.3%      | 10.6%      | n.s              | n.s             | n.s                |
| FOXF1 (TFFM0486.1) | 11.6%         | 11.8%      | 12.2%      | n.s              | n.s             | n.s                |
| FOXF2 (TFFM0706.1) | 10.8%         | 11.0%      | 11.3%      | n.s              | n.s             | n.s                |
| FOXG1 (TFFM0749.1) | 12.9%         | 12.3%      | 12.7%      | n.s              | n.s             | n.s                |
| FOXK1 (TFFM0134.1) | 21.4%         | 21.4%      | 20.9%      | n.s              | n.s             | n.s                |
| FOXK2 (TFFM0135.1) | 6.4%          | 6.3%       | 6.2%       | n.s              | n.s             | n.s                |
| FOXK2 (TFFM0135.2) | 5.0%          | 5.0%       | 4.8%       | n.s              | n.s             | n.s                |
| FOXO1 (TFFM0038.1) | 7.4%          | 7.6%       | 7.7%       | n.s              | n.s             | n.s                |
| FOXO3 (TFFM0721.1) | 8.7%          | 9.0%       | 8.8%       | n.s              | n.s             | n.s                |
| FOXP1 (TFFM0136.1) | 3.2%          | 3.1%       | 3.0%       | n.s              | n.s             | n.s                |
| FOXP1 (TFFM0726.1) | 4.4%          | 4.9%       | 4.8%       | n.s              | n.s             | n.s                |
| GABPA (TFFM0039.1) | 17.1%         | 16.7%      | 17.4%      | n.s              | n.s             | n.s                |
| GATA3 (TFFM0042.1) | 1.9%          | 1.8%       | 1.8%       | n.s              | n.s             | n.s                |

Continued on next page

**Table 3 – continued from previous page**

| <b>TFBS</b>         | <b>type 0</b> | <b>UHP</b> | <b>DHP</b> | <b>0 vs. UHP</b> | <b>0 vs DHP</b> | <b>UHP vs. DHP</b> |
|---------------------|---------------|------------|------------|------------------|-----------------|--------------------|
| GATA3 (TFFM0042.2)  | 3.4%          | 3.4%       | 3.3%       | n.s              | n.s             | n.s                |
| GATA3 (TFFM0707.1)  | 3.0%          | 3.0%       | 3.0%       | n.s              | n.s             | n.s                |
| GATA4 (TFFM0043.2)  | 3.0%          | 3.3%       | 3.3%       | n.s              | n.s             | n.s                |
| GATA6 (TFFM0137.1)  | 4.4%          | 4.7%       | 4.5%       | n.s              | n.s             | n.s                |
| GFI1 (TFFM0491.1)   | 3.7%          | 3.3%       | 3.3%       | n.s              | n.s             | n.s                |
| GLI2 (TFFM0778.1)   | 39.1%         | 39.7%      | 40.2%      | n.s              | n.s             | n.s                |
| GLI3 (TFFM0859.1)   | 0.5%          | 0.5%       | 0.4%       | n.s              | n.s             | n.s                |
| GLIS2 (TFFM0493.1)  | 0.3%          | 0.2%       | 0.2%       | n.s              | n.s             | n.s                |
| GLIS3 (TFFM0779.1)  | 2.3%          | 1.8%       | 1.9%       | n.s              | n.s             | n.s                |
| GMEB1 (TFFM0750.1)  | 12.0%         | 12.0%      | 11.6%      | n.s              | n.s             | n.s                |
| GRHL1 (TFFM0754.1)  | 8.1%          | 8.0%       | 8.5%       | n.s              | n.s             | n.s                |
| GRHL2 (TFFM0138.2)  | 9.3%          | 9.3%       | 9.3%       | n.s              | n.s             | n.s                |
| HES1 (TFFM0826.1)   | 0.5%          | 0.7%       | 0.8%       | n.s              | n.s             | n.s                |
| HEY1 (TFFM0796.1)   | 1.7%          | 1.6%       | 1.6%       | n.s              | n.s             | n.s                |
| HIF1A (TFFM0139.1)  | 32.1%         | 32.6%      | 32.1%      | n.s              | n.s             | n.s                |
| HLF (TFFM0500.1)    | 5.6%          | 5.4%       | 5.2%       | n.s              | n.s             | n.s                |
| HLF (TFFM0500.2)    | 5.1%          | 4.9%       | 4.9%       | n.s              | n.s             | n.s                |
| HMBOX1 (TFFM0177.1) | 0.9%          | 1.2%       | 0.9%       | n.s              | n.s             | n.s                |
| HNF1A (TFFM0503.1)  | 4.7%          | 4.7%       | 4.5%       | n.s              | n.s             | n.s                |
| HNF1B (TFFM0178.1)  | 4.5%          | 4.5%       | 4.5%       | n.s              | n.s             | n.s                |
| HNF4A (TFFM0045.1)  | 3.1%          | 2.7%       | 2.7%       | n.s              | n.s             | n.s                |
| HNF4A (TFFM0045.2)  | 1.7%          | 1.6%       | 1.6%       | n.s              | n.s             | n.s                |
| HNF4A (TFFM0860.1)  | 1.3%          | 1.3%       | 1.3%       | n.s              | n.s             | n.s                |
| HNF4G (TFFM0727.1)  | 2.2%          | 2.1%       | 2.1%       | n.s              | n.s             | n.s                |
| HOXA9 (TFFM0179.1)  | 1.6%          | 1.6%       | 1.5%       | n.s              | n.s             | n.s                |
| HOXA9 (TFFM0179.2)  | 0.5%          | 0.5%       | 0.5%       | n.s              | n.s             | n.s                |
| HOXB4 (TFFM0505.1)  | 8.0%          | 7.6%       | 7.9%       | n.s              | n.s             | n.s                |
| HOXB5 (TFFM0806.1)  | 15.1%         | 15.7%      | 15.7%      | n.s              | n.s             | n.s                |
| HOXB8 (TFFM0861.1)  | 0.4%          | 0.4%       | 0.4%       | n.s              | n.s             | n.s                |
| HOXC10 (TFFM0807.1) | 8.4%          | 8.5%       | 8.1%       | n.s              | n.s             | n.s                |
| IRF1 (TFFM0049.1)   | 6.0%          | 6.1%       | 6.5%       | n.s              | n.s             | n.s                |
| IRF3 (TFFM0851.1)   | 4.0%          | 3.8%       | 3.7%       | n.s              | n.s             | n.s                |
| JUN (TFFM0051.1)    | 6.2%          | 6.3%       | 6.2%       | n.s              | n.s             | n.s                |
| JUN (TFFM0728.1)    | 3.2%          | 3.4%       | 3.2%       | n.s              | n.s             | n.s                |
| JUNB (TFFM0052.1)   | 4.7%          | 4.8%       | 4.7%       | n.s              | n.s             | n.s                |
| JUNB (TFFM0052.2)   | 4.9%          | 5.0%       | 5.0%       | n.s              | n.s             | n.s                |
| JUND (TFFM0053.1)   | 5.2%          | 5.3%       | 5.2%       | n.s              | n.s             | n.s                |
| JUND (TFFM0053.2)   | 3.3%          | 3.4%       | 3.2%       | n.s              | n.s             | n.s                |
| KLF12 (TFFM0780.1)  | 33.6%         | 33.1%      | 32.9%      | n.s              | n.s             | n.s                |
| KLF15 (TFFM0942.1)  | 2.9%          | 2.5%       | 2.5%       | n.s              | n.s             | n.s                |
| KLF16 (TFFM0516.1)  | 20.9%         | 21.8%      | 21.1%      | n.s              | n.s             | n.s                |
| KLF1 (TFFM0729.1)   | 26.0%         | 25.8%      | 25.9%      | n.s              | n.s             | n.s                |
| KLF3 (TFFM0517.1)   | 39.6%         | 41.1%      | 41.0%      | n.s              | n.s             | n.s                |
| KLF4 (TFFM0056.1)   | 28.4%         | 28.3%      | 28.8%      | n.s              | n.s             | n.s                |

Continued on next page

**Table 3 – continued from previous page**

| <b>TFBS</b>          | <b>type 0</b> | <b>UHP</b> | <b>DHP</b> | <b>0 vs. UHP</b> | <b>0 vs DHP</b> | <b>UHP vs. DHP</b> |
|----------------------|---------------|------------|------------|------------------|-----------------|--------------------|
| KLF9 (TFFM0140.1)    | 21.6%         | 21.8%      | 20.8%      | n.s              | n.s             | n.s                |
| LEF1 (TFFM0184.1)    | 6.1%          | 5.9%       | 5.8%       | n.s              | n.s             | n.s                |
| LHX2 (TFFM0185.1)    | 1.7%          | 1.4%       | 1.6%       | n.s              | n.s             | n.s                |
| LHX3 (TFFM0717.1)    | 2.0%          | 1.9%       | 2.1%       | n.s              | n.s             | n.s                |
| LHX6 (TFFM0758.1)    | 9.2%          | 9.0%       | 9.2%       | n.s              | n.s             | n.s                |
| LMX1B (TFFM0772.1)   | 5.1%          | 5.3%       | 5.0%       | n.s              | n.s             | n.s                |
| MAFF (TFFM0730.1)    | 7.5%          | 7.5%       | 7.4%       | n.s              | n.s             | n.s                |
| MAFK (TFFM0058.1)    | 16.4%         | 16.1%      | 16.3%      | n.s              | n.s             | n.s                |
| MAX (TFFM0059.1)     | 11.1%         | 11.2%      | 10.8%      | n.s              | n.s             | n.s                |
| MEF2A (TFFM0060.1)   | 9.2%          | 9.3%       | 9.2%       | n.s              | n.s             | n.s                |
| MEF2A (TFFM0060.2)   | 9.3%          | 9.2%       | 9.5%       | n.s              | n.s             | n.s                |
| MEF2C (TFFM0061.1)   | 15.0%         | 15.7%      | 15.6%      | n.s              | n.s             | n.s                |
| MEF2D (TFFM0525.1)   | 10.4%         | 10.5%      | 10.6%      | n.s              | n.s             | n.s                |
| MEIS2 (TFFM0190.1)   | 2.5%          | 3.0%       | 2.8%       | n.s              | n.s             | n.s                |
| MEIS2 (TFFM0895.1)   | 6.4%          | 6.1%       | 6.1%       | n.s              | n.s             | n.s                |
| MGA (TFFM0526.1)     | 11.6%         | 11.6%      | 11.2%      | n.s              | n.s             | n.s                |
| MYB (TFFM0064.1)     | 13.2%         | 13.3%      | 13.5%      | n.s              | n.s             | n.s                |
| MYB (TFFM0064.2)     | 8.5%          | 8.6%       | 8.3%       | n.s              | n.s             | n.s                |
| MYBL2 (TFFM0065.1)   | 3.9%          | 4.0%       | 4.0%       | n.s              | n.s             | n.s                |
| MYC (TFFM0066.1)     | 17.4%         | 17.7%      | 17.3%      | n.s              | n.s             | n.s                |
| MYC (TFFM0066.2)     | 6.0%          | 6.1%       | 5.6%       | n.s              | n.s             | n.s                |
| MYOG (TFFM0069.1)    | 8.1%          | 7.8%       | 8.0%       | n.s              | n.s             | n.s                |
| MYOG (TFFM0069.2)    | 14.0%         | 13.6%      | 14.1%      | n.s              | n.s             | n.s                |
| NEUROG2 (TFFM0534.1) | 14.0%         | 13.7%      | 14.2%      | n.s              | n.s             | n.s                |
| NEUROG2 (TFFM0896.1) | 14.7%         | 14.3%      | 15.0%      | n.s              | n.s             | n.s                |
| NFE2 (TFFM0070.1)    | 6.0%          | 5.8%       | 5.8%       | n.s              | n.s             | n.s                |
| NFE2L1 (TFFM0536.1)  | 5.8%          | 5.7%       | 6.1%       | n.s              | n.s             | n.s                |
| NFIB (TFFM0681.1)    | 2.8%          | 2.4%       | 2.3%       | n.s              | n.s             | n.s                |
| NFIL3 (TFFM0539.2)   | 10.4%         | 10.6%      | 10.5%      | n.s              | n.s             | n.s                |
| NFIX (TFFM0864.1)    | 2.8%          | 2.5%       | 2.5%       | n.s              | n.s             | n.s                |
| NFKB1 (TFFM0073.1)   | 3.7%          | 3.8%       | 3.4%       | n.s              | n.s             | n.s                |
| NKX2-2 (TFFM0683.1)  | 0.9%          | 0.7%       | 0.5%       | n.s              | n.s             | n.s                |
| NKX2-5 (TFFM0076.2)  | 2.0%          | 1.9%       | 1.6%       | n.s              | n.s             | n.s                |
| NKX2-5 (TFFM0077.1)  | 0.6%          | 0.4%       | 0.5%       | n.s              | n.s             | n.s                |
| NKX3-1 (TFFM0078.1)  | 5.8%          | 5.7%       | 5.4%       | n.s              | n.s             | n.s                |
| NKX3-2 (TFFM0716.1)  | 5.3%          | 5.8%       | 5.3%       | n.s              | n.s             | n.s                |
| NKX6-1 (TFFM0762.1)  | 2.2%          | 1.9%       | 1.9%       | n.s              | n.s             | n.s                |
| NR1D1 (TFFM0865.1)   | 0.4%          | 0.4%       | 0.4%       | n.s              | n.s             | n.s                |
| NR1D2 (TFFM0866.1)   | 0.7%          | 0.7%       | 0.6%       | n.s              | n.s             | n.s                |
| NR1H2 (TFFM0993.1)   | 11.4%         | 11.7%      | 11.8%      | n.s              | n.s             | n.s                |
| NR1H4 (TFFM0828.1)   | 1.6%          | 1.6%       | 1.5%       | n.s              | n.s             | n.s                |
| NR2C2 (TFFM0867.1)   | 2.7%          | 2.7%       | 2.2%       | n.s              | n.s             | n.s                |
| NR2F1 (TFFM0868.1)   | 6.2%          | 6.7%       | 6.6%       | n.s              | n.s             | n.s                |
| NR2F6 (TFFM0195.1)   | 7.3%          | 7.0%       | 7.3%       | n.s              | n.s             | n.s                |

Continued on next page

**Table 3 – continued from previous page**

| <b>TFBS</b>          | <b>type 0</b> | <b>UHP</b> | <b>DHP</b> | <b>0 vs. UHP</b> | <b>0 vs DHP</b> | <b>UHP vs. DHP</b> |
|----------------------|---------------|------------|------------|------------------|-----------------|--------------------|
| NR2F6 (TFFM0870.1)   | 21.3%         | 21.5%      | 21.1%      | n.s              | n.s             | n.s                |
| NR4A1 (TFFM0145.1)   | 2.5%          | 2.6%       | 2.4%       | n.s              | n.s             | n.s                |
| NR4A1 (TFFM0145.2)   | 1.8%          | 2.1%       | 1.7%       | n.s              | n.s             | n.s                |
| NR5A2 (TFFM0081.1)   | 3.2%          | 3.1%       | 2.9%       | n.s              | n.s             | n.s                |
| ONECUT1 (TFFM0196.1) | 0.7%          | 0.8%       | 0.6%       | n.s              | n.s             | n.s                |
| ONECUT1 (TFFM0196.2) | 1.1%          | 1.1%       | 1.0%       | n.s              | n.s             | n.s                |
| ONECUT2 (TFFM0546.1) | 3.9%          | 3.5%       | 3.8%       | n.s              | n.s             | n.s                |
| ONECUT2 (TFFM0783.1) | 0.6%          | 0.6%       | 0.4%       | n.s              | n.s             | n.s                |
| OSR1 (TFFM0872.1)    | 0.2%          | 0.2%       | 0.2%       | n.s              | n.s             | n.s                |
| OSR2 (TFFM0897.1)    | 25.4%         | 25.7%      | 25.2%      | n.s              | n.s             | n.s                |
| OTX2 (TFFM0197.2)    | 3.9%          | 4.2%       | 4.2%       | n.s              | n.s             | n.s                |
| OVOL1 (TFFM0873.1)   | 1.5%          | 1.8%       | 1.8%       | n.s              | n.s             | n.s                |
| PAX3 (TFFM0787.1)    | 0.3%          | 0.3%       | 0.3%       | n.s              | n.s             | n.s                |
| PAX3 (TFFM0874.1)    | 4.6%          | 4.8%       | 5.0%       | n.s              | n.s             | n.s                |
| PAX5 (TFFM0084.1)    | 5.6%          | 5.4%       | 5.5%       | n.s              | n.s             | n.s                |
| PAX7 (TFFM0550.1)    | 1.3%          | 1.3%       | 1.6%       | n.s              | n.s             | n.s                |
| PAX7 (TFFM0764.1)    | 2.7%          | 2.7%       | 3.1%       | n.s              | n.s             | n.s                |
| PBX1 (TFFM0551.1)    | 5.5%          | 5.3%       | 5.4%       | n.s              | n.s             | n.s                |
| PBX2 (TFFM0146.2)    | 4.9%          | 5.2%       | 5.4%       | n.s              | n.s             | n.s                |
| PBX3 (TFFM0147.1)    | 5.7%          | 5.6%       | 5.4%       | n.s              | n.s             | n.s                |
| PDX1 (TFFM0198.2)    | 3.6%          | 3.1%       | 3.3%       | n.s              | n.s             | n.s                |
| PHOX2A (TFFM0773.1)  | 2.8%          | 3.1%       | 3.2%       | n.s              | n.s             | n.s                |
| PHOX2B (TFFM0554.1)  | 0.7%          | 0.7%       | 0.6%       | n.s              | n.s             | n.s                |
| PHOX2B (TFFM0554.2)  | 0.6%          | 0.7%       | 0.6%       | n.s              | n.s             | n.s                |
| PITX1 (TFFM0559.1)   | 1.2%          | 1.1%       | 0.9%       | n.s              | n.s             | n.s                |
| POU2F3 (TFFM0562.1)  | 6.6%          | 6.8%       | 6.6%       | n.s              | n.s             | n.s                |
| POU2F3 (TFFM0562.2)  | 7.0%          | 6.9%       | 6.9%       | n.s              | n.s             | n.s                |
| POU3F1 (TFFM0789.1)  | 0.8%          | 0.8%       | 0.8%       | n.s              | n.s             | n.s                |
| POU3F2 (TFFM0563.1)  | 3.2%          | 3.2%       | 3.3%       | n.s              | n.s             | n.s                |
| PPARD (TFFM0875.1)   | 3.5%          | 4.0%       | 3.6%       | n.s              | n.s             | n.s                |
| PRDM1 (TFFM0087.1)   | 5.1%          | 5.3%       | 5.6%       | n.s              | n.s             | n.s                |
| PRDM4 (TFFM0898.1)   | 4.1%          | 4.3%       | 4.2%       | n.s              | n.s             | n.s                |
| PROP1 (TFFM0774.1)   | 4.9%          | 5.1%       | 5.1%       | n.s              | n.s             | n.s                |
| PROX1 (TFFM0199.1)   | 0.1%          | 0.0%       | 0.1%       | n.s              | n.s             | n.s                |
| PTF1A (TFFM0887.1)   | 9.5%          | 9.1%       | 9.2%       | n.s              | n.s             | n.s                |
| RARA (TFFM0571.1)    | 2.6%          | 2.4%       | 2.6%       | n.s              | n.s             | n.s                |
| RARA (TFFM0777.1)    | 0.2%          | 0.1%       | 0.1%       | n.s              | n.s             | n.s                |
| RARB (TFFM0802.1)    | 0.4%          | 0.3%       | 0.3%       | n.s              | n.s             | n.s                |
| RARB (TFFM0876.1)    | 0.3%          | 0.2%       | 0.2%       | n.s              | n.s             | n.s                |
| RELA (TFFM0200.1)    | 4.5%          | 4.1%       | 4.3%       | n.s              | n.s             | n.s                |
| REST (TFFM0088.1)    | 10.3%         | 10.1%      | 10.1%      | n.s              | n.s             | n.s                |
| RORA (TFFM0709.1)    | 0.2%          | 0.1%       | 0.1%       | n.s              | n.s             | n.s                |
| RORB (TFFM0830.1)    | 14.1%         | 14.4%      | 14.8%      | n.s              | n.s             | n.s                |
| RORC (TFFM0578.1)    | 9.8%          | 9.8%       | 9.7%       | n.s              | n.s             | n.s                |

Continued on next page



**Table 3 – continued from previous page**

| <b>TFBS</b>         | <b>type 0</b> | <b>UHP</b> | <b>DHP</b> | <b>0 vs. UHP</b> | <b>0 vs DHP</b> | <b>UHP vs. DHP</b> |
|---------------------|---------------|------------|------------|------------------|-----------------|--------------------|
| RUNX1 (TFFM0091.1)  | 8.3%          | 7.9%       | 8.3%       | n.s              | n.s             | n.s                |
| RUNX2 (TFFM0092.1)  | 25.8%         | 25.7%      | 26.1%      | n.s              | n.s             | n.s                |
| RUNX3 (TFFM0093.2)  | 4.4%          | 4.3%       | 3.9%       | n.s              | n.s             | n.s                |
| RXRA (TFFM0094.1)   | 3.1%          | 2.8%       | 2.7%       | n.s              | n.s             | n.s                |
| RXRB (TFFM0579.1)   | 0.7%          | 0.7%       | 0.8%       | n.s              | n.s             | n.s                |
| SCRT2 (TFFM0581.1)  | 7.3%          | 7.1%       | 6.9%       | n.s              | n.s             | n.s                |
| SCRT2 (TFFM0581.2)  | 6.9%          | 6.9%       | 6.5%       | n.s              | n.s             | n.s                |
| SIX2 (TFFM0150.1)   | 5.2%          | 5.1%       | 5.5%       | n.s              | n.s             | n.s                |
| SMAD2 (TFFM0201.1)  | 5.4%          | 5.8%       | 5.6%       | n.s              | n.s             | n.s                |
| SMAD3 (TFFM0202.1)  | 0.2%          | 0.1%       | 0.2%       | n.s              | n.s             | n.s                |
| SOX11 (TFFM0803.1)  | 5.4%          | 5.5%       | 5.0%       | n.s              | n.s             | n.s                |
| SOX13 (TFFM0586.1)  | 5.8%          | 6.1%       | 5.9%       | n.s              | n.s             | n.s                |
| SOX2 (TFFM0095.2)   | 7.6%          | 7.6%       | 7.3%       | n.s              | n.s             | n.s                |
| SOX3 (TFFM0096.1)   | 9.8%          | 9.6%       | 9.8%       | n.s              | n.s             | n.s                |
| SOX6 (TFFM0588.1)   | 3.0%          | 2.6%       | 2.6%       | n.s              | n.s             | n.s                |
| SP1 (TFFM0712.1)    | 30.0%         | 31.1%      | 30.5%      | n.s              | n.s             | n.s                |
| SP2 (TFFM0735.1)    | 27.5%         | 28.1%      | 27.3%      | n.s              | n.s             | n.s                |
| SP3 (TFFM0590.1)    | 18.6%         | 19.0%      | 18.5%      | n.s              | n.s             | n.s                |
| SP4 (TFFM0765.1)    | 26.6%         | 27.5%      | 26.7%      | n.s              | n.s             | n.s                |
| SREBF1 (TFFM0205.1) | 7.0%          | 6.8%       | 6.9%       | n.s              | n.s             | n.s                |
| SREBF1 (TFFM0206.1) | 6.5%          | 6.3%       | 6.3%       | n.s              | n.s             | n.s                |
| STAT1 (TFFM0101.1)  | 6.5%          | 6.6%       | 6.2%       | n.s              | n.s             | n.s                |
| STAT4 (TFFM0103.1)  | 13.6%         | 13.5%      | 13.4%      | n.s              | n.s             | n.s                |
| STAT5A (TFFM0594.1) | 7.7%          | 7.3%       | 7.3%       | n.s              | n.s             | n.s                |
| STAT5B (TFFM0595.1) | 9.3%          | 9.2%       | 9.3%       | n.s              | n.s             | n.s                |
| TBX21 (TFFM0208.1)  | 3.9%          | 3.7%       | 3.5%       | n.s              | n.s             | n.s                |
| TBX21 (TFFM0767.1)  | 0.3%          | 0.2%       | 0.2%       | n.s              | n.s             | n.s                |
| TBX3 (TFFM0598.1)   | 3.9%          | 4.1%       | 3.7%       | n.s              | n.s             | n.s                |
| TBX3 (TFFM0879.1)   | 0.5%          | 0.5%       | 0.5%       | n.s              | n.s             | n.s                |
| TCF21 (TFFM0881.1)  | 32.4%         | 31.7%      | 32.9%      | n.s              | n.s             | n.s                |
| TCF7 (TFFM0209.1)   | 1.9%          | 2.0%       | 1.7%       | n.s              | n.s             | n.s                |
| TCF7L2 (TFFM0109.1) | 2.5%          | 2.4%       | 2.3%       | n.s              | n.s             | n.s                |
| TEAD1 (TFFM0210.2)  | 2.8%          | 2.7%       | 2.8%       | n.s              | n.s             | n.s                |
| TEAD3 (TFFM0603.1)  | 1.2%          | 1.2%       | 1.3%       | n.s              | n.s             | n.s                |
| TEAD4 (TFFM0110.1)  | 16.5%         | 15.9%      | 16.1%      | n.s              | n.s             | n.s                |
| TEAD4 (TFFM0110.2)  | 1.8%          | 1.9%       | 2.1%       | n.s              | n.s             | n.s                |
| TFAP2A (TFFM0111.1) | 18.1%         | 17.9%      | 17.5%      | n.s              | n.s             | n.s                |
| TFAP2A (TFFM0113.1) | 17.3%         | 17.4%      | 17.5%      | n.s              | n.s             | n.s                |
| TFAP4 (TFFM0882.1)  | 9.3%          | 8.9%       | 9.0%       | n.s              | n.s             | n.s                |
| TFCP2 (TFFM0929.1)  | 3.5%          | 3.7%       | 3.7%       | n.s              | n.s             | n.s                |
| TFDP1 (TFFM0154.1)  | 6.6%          | 6.6%       | 6.8%       | n.s              | n.s             | n.s                |
| TFE3 (TFFM0605.1)   | 7.6%          | 7.6%       | 7.9%       | n.s              | n.s             | n.s                |
| TGIF1 (TFFM0606.1)  | 17.2%         | 17.8%      | 17.9%      | n.s              | n.s             | n.s                |
| TGIF2 (TFFM0790.1)  | 0.5%          | 0.6%       | 0.5%       | n.s              | n.s             | n.s                |

Continued on next page

**Table 3 – continued from previous page**

| <b>TFBS</b>          | <b>type 0</b> | <b>UHP</b> | <b>DHP</b> | <b>0 vs. UHP</b> | <b>0 vs DHP</b> | <b>UHP vs. DHP</b> |
|----------------------|---------------|------------|------------|------------------|-----------------|--------------------|
| THAP1 (TFFM0213.1)   | 2.8%          | 2.7%       | 2.8%       | n.s              | n.s             | n.s                |
| THAP1 (TFFM0744.1)   | 1.8%          | 2.3%       | 2.1%       | n.s              | n.s             | n.s                |
| THRB (TFFM0884.1)    | 6.0%          | 6.1%       | 6.2%       | n.s              | n.s             | n.s                |
| TP53 (TFFM0119.1)    | 2.9%          | 2.9%       | 3.0%       | n.s              | n.s             | n.s                |
| TWIST1 (TFFM0155.1)  | 12.5%         | 12.0%      | 12.5%      | n.s              | n.s             | n.s                |
| VDR (TFFM0769.1)     | 0.2%          | 0.3%       | 0.1%       | n.s              | n.s             | n.s                |
| VEZF1 (TFFM0616.1)   | 19.6%         | 19.9%      | 19.4%      | n.s              | n.s             | n.s                |
| XBP1 (TFFM0214.1)    | 6.0%          | 5.7%       | 6.2%       | n.s              | n.s             | n.s                |
| ZBED2 (TFFM0979.1)   | 4.6%          | 5.0%       | 4.8%       | n.s              | n.s             | n.s                |
| ZBTB12 (TFFM0693.1)  | 3.5%          | 3.5%       | 3.7%       | n.s              | n.s             | n.s                |
| ZBTB14 (TFFM0694.1)  | 0.8%          | 0.8%       | 0.7%       | n.s              | n.s             | n.s                |
| ZBTB33 (TFFM0125.1)  | 3.7%          | 3.6%       | 3.7%       | n.s              | n.s             | n.s                |
| ZEB1 (TFFM0127.2)    | 11.9%         | 12.1%      | 12.4%      | n.s              | n.s             | n.s                |
| ZFP57 (TFFM0627.1)   | 26.8%         | 28.0%      | 27.6%      | n.s              | n.s             | n.s                |
| ZFX (TFFM0128.1)     | 11.2%         | 11.6%      | 11.6%      | n.s              | n.s             | n.s                |
| ZIC5 (TFFM0886.1)    | 23.6%         | 23.9%      | 23.2%      | n.s              | n.s             | n.s                |
| ZKSCAN3 (TFFM0981.1) | 0.9%          | 0.9%       | 0.8%       | n.s              | n.s             | n.s                |
| ZKSCAN5 (TFFM0697.1) | 20.9%         | 20.7%      | 21.0%      | n.s              | n.s             | n.s                |
| ZNF140 (TFFM0634.1)  | 1.7%          | 1.8%       | 2.0%       | n.s              | n.s             | n.s                |
| ZNF143 (TFFM0129.1)  | 5.1%          | 5.6%       | 5.3%       | n.s              | n.s             | n.s                |
| ZNF148 (TFFM0698.1)  | 25.1%         | 25.0%      | 24.7%      | n.s              | n.s             | n.s                |
| ZNF16 (TFFM0699.1)   | 0.4%          | 0.2%       | 0.3%       | n.s              | n.s             | n.s                |
| ZNF24 (TFFM0156.1)   | 0.8%          | 0.7%       | 0.7%       | n.s              | n.s             | n.s                |
| ZNF263 (TFFM0130.1)  | 11.3%         | 11.2%      | 11.6%      | n.s              | n.s             | n.s                |
| ZNF263 (TFFM0130.2)  | 7.7%          | 7.6%       | 7.5%       | n.s              | n.s             | n.s                |
| ZNF281 (TFFM0889.1)  | 16.0%         | 16.1%      | 16.1%      | n.s              | n.s             | n.s                |
| ZNF282 (TFFM0638.1)  | 16.3%         | 16.4%      | 16.1%      | n.s              | n.s             | n.s                |
| ZNF382 (TFFM0640.1)  | 1.8%          | 1.7%       | 1.7%       | n.s              | n.s             | n.s                |
| ZNF384 (TFFM0157.1)  | 0.8%          | 0.6%       | 0.8%       | n.s              | n.s             | n.s                |
| ZNF416 (TFFM0982.1)  | 10.7%         | 10.5%      | 10.2%      | n.s              | n.s             | n.s                |
| ZNF460 (TFFM0642.1)  | 3.8%          | 3.6%       | 3.5%       | n.s              | n.s             | n.s                |
| ZNF528 (TFFM0643.1)  | 1.4%          | 1.5%       | 1.5%       | n.s              | n.s             | n.s                |
| ZNF582 (TFFM0983.1)  | 47.4%         | 48.8%      | 48.3%      | n.s              | n.s             | n.s                |
| ZNF675 (TFFM0911.1)  | 3.5%          | 3.0%       | 3.2%       | n.s              | n.s             | n.s                |
| ZNF680 (TFFM0922.1)  | 4.5%          | 4.7%       | 4.9%       | n.s              | n.s             | n.s                |
| ZNF682 (TFFM0645.1)  | 4.6%          | 4.4%       | 4.5%       | n.s              | n.s             | n.s                |
| ZNF707 (TFFM0912.1)  | 10.4%         | 10.2%      | 10.4%      | n.s              | n.s             | n.s                |
| ZNF768 (TFFM0924.1)  | 3.5%          | 3.6%       | 3.6%       | n.s              | n.s             | n.s                |
| ZNF85 (TFFM0915.1)   | 2.4%          | 2.4%       | 2.4%       | n.s              | n.s             | n.s                |
| ZNF8 (TFFM0913.1)    | 4.9%          | 4.7%       | 4.6%       | n.s              | n.s             | n.s                |
| ZSCAN4 (TFFM0831.1)  | 1.0%          | 0.8%       | 0.9%       | n.s              | n.s             | n.s                |

| <b>CPE/feature</b> | <b>type 0</b> | <b>UHP</b> | <b>DHP</b> | <b>0 vs. UHP</b> | <b>0 vs DHP</b>         | <b>UHP vs. DHP</b> |
|--------------------|---------------|------------|------------|------------------|-------------------------|--------------------|
| AnyTags            | 99.3%         | 99.9%      | 99.9%      | n.s              | n.s                     | n.s                |
| BREd               | 16.4%         | 19.3%      | 18.1%      | 0.002699*        | 0.06                    | 0.18               |
| BREu               | 15.1%         | 13.8%      | 14.6%      | 0.09             | n.s                     | 0.26               |
| Bridge             | 2.2%          | 2.3%       | 2.0%       | n.s              | n.s                     | n.s                |
| Broad              | 90.8%         | 91.8%      | 92.1%      | n.s              | n.s                     | n.s                |
| CpG                | 61.3%         | 65.4%      | 66.4%      | 0.000963*        | $4.20 \times 10^{-5} *$ | n.s                |
| DCE                | 2.2%          | 2.6%       | 2.4%       | n.s              | n.s                     | n.s                |
| DCE3               | 14.3%         | 14.3%      | 13.8%      | n.s              | n.s                     | n.s                |
| DPE                | 12.6%         | 12.4%      | 13.0%      | n.s              | n.s                     | n.s                |
| Inr                | 39.7%         | 40.4%      | 38.8%      | n.s              | n.s                     | n.s                |
| MTE                | 0.9%          | 0.8%       | 0.9%       | n.s              | n.s                     | n.s                |
| Sharp              | 8.6%          | 8.1%       | 7.8%       | n.s              | 0.16                    | n.s                |
| TATA               | 10.0%         | 7.4%       | 6.4%       | 0.000472*        | $p < 10^{-6} *$         | 0.15               |
| TCT                | 12.4%         | 11.8%      | 11.3%      | n.s              | 0.10                    | n.s                |
| XCPE1              | 3.1%          | 2.6%       | 2.4%       | n.s              | 0.08                    | n.s                |
| XCPE2              | 2.2%          | 2.7%       | 3.0%       | n.s              | 0.036007                | n.s                |

**Table 4:** Frequency of occurrence of core promoter elements (CPEs) and other promoter-related features defined as in (56). See main text for definitions of type 0, UHP, and DHP. The Bonferroni corrected threshold of  $\alpha = 0.05$  is  $3.57 \times 10^{-3}$ . \*) significant at this threshold.

**Table 5:** Frequency of occurrence of RNA Binding Protein (RBP) Binding Sites. See main text for definitions of type 0, UHP, and DHP. The Bonferroni corrected threshold of  $\alpha = 0.05$  is  $7.35 \times 10^{-4}$ . \*) significant at this threshold.

| RBP                     | type 0 | UHP   | DHP   | 0 vs. UHP               | 0 vs DHP                | UHP vs. DHP |
|-------------------------|--------|-------|-------|-------------------------|-------------------------|-------------|
| ELAVL1 (1170_19561594)  | 48.6%  | 55.2% | 54.4% | $p < 10^{-6}$ *         | $p < 10^{-6}$ *         | n.s         |
| RBM4 (1172_19561594)    | 25.0%  | 20.8% | 19.6% | $p < 10^{-6}$ *         | $p < 10^{-6}$ *         | 0.018992    |
| KHDRBS3 (1174_19561594) | 30.6%  | 36.7% | 35.5% | $p < 10^{-6}$ *         | $p < 10^{-6}$ *         | n.s         |
| Vts1 (1176_19561594)    | 19.7%  | 17.5% | 17.8% | $p < 10^{-6}$ *         | $p < 10^{-6}$ *         | n.s         |
| YBX1 (1177_19561594)    | 36.7%  | 32.8% | 32.8% | $p < 10^{-6}$ *         | $p < 10^{-6}$ *         | n.s         |
| QKI (1215_16041388)     | 17.9%  | 20.9% | 20.2% | $p < 10^{-6}$ *         | $p < 10^{-6}$ *         | n.s         |
| ZRANB2 (1285_19304800)  | 36.3%  | 40.7% | 41.5% | $p < 10^{-6}$ *         | $p < 10^{-6}$ *         | n.s         |
| HNRNPA1 (23_7510636)    | 31.0%  | 33.5% | 32.7% | $p < 10^{-6}$ *         | $9.40 \times 10^{-5}$ * | n.s         |
| SFRS1 (243_7543047)     | 4.7%   | 4.0%  | 3.5%  | $9.00 \times 10^{-5}$ * | $p < 10^{-6}$ *         | 0.035681    |
| PABPC1 (24_7908267)     | 20.2%  | 22.9% | 22.7% | $p < 10^{-6}$ *         | $p < 10^{-6}$ *         | n.s         |
| EIF4B (351_8846295)     | 29.1%  | 27.7% | 26.4% | 0.000237*               | $p < 10^{-6}$ *         | n.s         |
| a2bp1 (36_12574126)     | 25.2%  | 22.9% | 23.1% | $p < 10^{-6}$ *         | $p < 10^{-6}$ *         | n.s         |
| NONO (488_9001221)      | 41.1%  | 42.9% | 43.6% | n.s                     | $p < 10^{-6}$ *         | n.s         |
| FUS (637_11098054)      | 28.3%  | 25.4% | 24.7% | $p < 10^{-6}$ *         | $p < 10^{-6}$ *         | n.s         |
| MBNL1 (669_20071745)    | 32.0%  | 29.5% | 28.9% | $p < 10^{-6}$ *         | $p < 10^{-6}$ *         | n.s         |
| ELAVL2 (782_8497264)    | 5.9%   | 6.9%  | 7.2%  | $1.00 \times 10^{-5}$ * | $p < 10^{-6}$ *         | n.s         |
| ELAVL2 (783_7972035)    | 10.9%  | 14.1% | 14.2% | $p < 10^{-6}$ *         | $p < 10^{-6}$ *         | n.s         |
| ELAVL2 (784_7972035)    | 8.6%   | 11.2% | 10.8% | $p < 10^{-6}$ *         | $p < 10^{-6}$ *         | n.s         |
| RBMX (922_19282290)     | 49.6%  | 45.2% | 46.9% | $p < 10^{-6}$ *         | $p < 10^{-6}$ *         | n.s         |
| PABPC1 (950_7908267)    | 25.4%  | 28.2% | 28.6% | $p < 10^{-6}$ *         | $p < 10^{-6}$ *         | n.s         |
| ZFP36 (951_12324455)    | 7.0%   | 9.7%  | 9.3%  | $p < 10^{-6}$ *         | $p < 10^{-6}$ *         | n.s         |
| SFRS1 (242_7543047)     | 20.7%  | 20.9% | 19.0% | n.s                     | $p < 10^{-6}$ *         | 0.000267*   |
| KHSRP (1186_17893325)   | 9.3%   | 8.7%  | 8.1%  | 0.015073                | $p < 10^{-6}$ *         | 0.06        |
| Pum2 (329_11780640)     | 8.3%   | 9.4%  | 8.9%  | $p < 10^{-6}$ *         | 0.009904                | n.s         |
| sap-49 (145_9163526)    | 18.9%  | 17.4% | 17.9% | $1.80 \times 10^{-5}$ * | 0.004345                | n.s         |
| Psi (915_11565747)      | 19.5%  | 21.0% | 20.5% | $2.50 \times 10^{-5}$ * | 0.002388                | n.s         |
| ybx2-a (114_7499328)    | 14.2%  | 15.5% | 15.0% | $3.50 \times 10^{-5}$ * | 0.008450                | n.s         |
| KHDRBS3 (1216_19457263) | 3.4%   | 4.1%  | 4.0%  | 0.000121*               | 0.000766                | n.s         |
| ybx2-a (115_7499328)    | 11.9%  | 13.0% | 12.7% | 0.000294*               | 0.006111                | n.s         |
| ZFP36 (221_12324455)    | 3.3%   | 3.7%  | 3.9%  | n.s                     | 0.000311*               | n.s         |
| SNRPA (662_1717938)     | 4.1%   | 4.7%  | 4.3%  | 0.000955                | n.s                     | n.s         |
| SFRS1 (952_7543047)     | 9.7%   | 9.0%  | 9.2%  | 0.002765                | n.s                     | n.s         |
| QKI (149_16041388)      | 2.3%   | 2.8%  | 2.2%  | n.s                     | n.s                     | 0.003777    |
| RBM1A1 (1052_17318228)  | 15.3%  | 14.4% | 15.5% | 0.005060                | n.s                     | 0.009171    |
| SNRPA (946_10094314)    | 2.9%   | 3.1%  | 2.5%  | n.s                     | n.s                     | 0.008204    |
| PTBP1 (1171_19561594)   | 6.4%   | 6.9%  | 6.3%  | n.s                     | n.s                     | 0.039223    |
| NCL (1004_8676391)      | 0.0%   | 0.0%  | 0.0%  | n.s                     | n.s                     | n.s         |
| NCL (1026_10858445)     | 5.1%   | 5.3%  | 4.9%  | n.s                     | n.s                     | n.s         |
| RBM1A1 (1053_17318228)  | 35.4%  | 35.1% | 36.5% | n.s                     | n.s                     | n.s         |
| SFRS13A (1169_19561594) | 61.5%  | 61.1% | 61.1% | n.s                     | n.s                     | n.s         |
| SFRS1 (1173_19561594)   | 36.6%  | 36.1% | 34.8% | n.s                     | n.s                     | n.s         |

Continued on next page

**Table 5 – continued from previous page**

| <b>RBP</b>             | <b>type 0</b> | <b>UHP</b> | <b>DHP</b> | <b>0 vs. UHP</b> | <b>0 vs DHP</b> | <b>UHP vs. DHP</b> |
|------------------------|---------------|------------|------------|------------------|-----------------|--------------------|
| SNRPA (1175_19561594)  | 6.6%          | 6.5%       | 6.4%       | n.s              | n.s             | n.s                |
| KHSRP (1185_17893325)  | 1.7%          | 1.4%       | 1.6%       | n.s              | n.s             | n.s                |
| ACO1 (1213_8021254)    | 52.2%         | 50.9%      | 50.8%      | n.s              | n.s             | n.s                |
| ybx2-a (130_11376140)  | 0.3%          | 0.2%       | 0.2%       | n.s              | n.s             | n.s                |
| NCL (131_11376140)     | 1.1%          | 1.2%       | 1.2%       | n.s              | n.s             | n.s                |
| KHDRBS3 (147_19457263) | 2.9%          | 3.0%       | 3.0%       | n.s              | n.s             | n.s                |
| SFRS2 (244_7543047)    | 11.3%         | 11.8%      | 11.4%      | n.s              | n.s             | n.s                |
| sus (254_1714588)      | 8.9%          | 9.0%       | 8.9%       | n.s              | n.s             | n.s                |
| pum (323_16537387)     | 2.0%          | 2.4%       | 2.3%       | n.s              | n.s             | n.s                |
| Pum2 (330_11780640)    | 1.2%          | 1.0%       | 1.2%       | n.s              | n.s             | n.s                |
| EIF4B (350_8846295)    | 30.4%         | 30.0%      | 29.7%      | n.s              | n.s             | n.s                |
| EIF4B (352_8846295)    | 48.6%         | 47.9%      | 47.3%      | n.s              | n.s             | n.s                |
| IGF2BP1 (359_12507992) | 0.6%          | 0.7%       | 0.6%       | n.s              | n.s             | n.s                |
| Rna15 (376_9199325)    | 0.3%          | 0.2%       | 0.3%       | n.s              | n.s             | n.s                |
| Rna15 (377_9199325)    | 0.2%          | 0.1%       | 0.1%       | n.s              | n.s             | n.s                |
| A2BP1 (37_16537540)    | 12.4%         | 12.1%      | 11.9%      | n.s              | n.s             | n.s                |
| SNRPA (661_1717938)    | 3.4%          | 3.8%       | 3.5%       | n.s              | n.s             | n.s                |
| SNRPA (663_1717938)    | 2.6%          | 2.8%       | 2.7%       | n.s              | n.s             | n.s                |
| NOVA2 (680_9789075)    | 1.0%          | 1.1%       | 0.9%       | n.s              | n.s             | n.s                |
| NOVA2 (682_10811881)   | 1.4%          | 1.3%       | 1.1%       | n.s              | n.s             | n.s                |
| SFRS7 (790_10094314)   | 2.5%          | 2.5%       | 2.6%       | n.s              | n.s             | n.s                |
| SFRS2 (791_10094314)   | 3.9%          | 4.3%       | 4.4%       | n.s              | n.s             | n.s                |
| SFRS9 (797_17548433)   | 80.1%         | 80.3%      | 78.8%      | n.s              | n.s             | n.s                |
| B52 (802_9111335)      | 0.0%          | 0.0%       | 0.0%       | n.s              | n.s             | n.s                |
| SNRPA (947_10094314)   | 7.1%          | 6.7%       | 6.7%       | n.s              | n.s             | n.s                |
| SNRPA (948_10094314)   | 1.8%          | 1.8%       | 1.7%       | n.s              | n.s             | n.s                |
| SNRPA (949_10094314)   | 32.8%         | 33.1%      | 31.6%      | n.s              | n.s             | n.s                |
| SFRS2 (953_7543047)    | 19.2%         | 19.6%      | 18.7%      | n.s              | n.s             | n.s                |
| SFRS7 (954_10094314)   | 10.2%         | 10.7%      | 10.7%      | n.s              | n.s             | n.s                |
| YTHDC1 (969_20167602)  | 83.0%         | 81.8%      | 81.6%      | n.s              | n.s             | n.s                |

---

|             |             |             |
|-------------|-------------|-------------|
| ENCFF012VQA | ENCFF039TJY | ENCFF043FHJ |
| ENCFF061DKX | ENCFF064ASM | ENCFF065MQK |
| ENCFF082DKP | ENCFF105LDY | ENCFF107SJD |
| ENCFF129APS | ENCFF132MQB | ENCFF151LHR |
| ENCFF159PYD | ENCFF160KVW | ENCFF166EUJ |
| ENCFF175PDD | ENCFF195PBD | ENCFF211PWC |
| ENCFF216PEY | ENCFF218GFN | ENCFF226BZE |
| ENCFF227ELA | ENCFF229KAY | ENCFF235UTX |
| ENCFF245CAL | ENCFF254MJA | ENCFF258NNN |
| ENCFF292PBX | ENCFF322DAE | ENCFF341YAZ |
| ENCFF354VWZ | ENCFF355MNE | ENCFF371CYY |
| ENCFF376CIT | ENCFF389ZBU | ENCFF394NVG |
| ENCFF396ZQL | ENCFF410CPY | ENCFF411PMA |
| ENCFF448ZOJ | ENCFF451XZC | ENCFF456FTV |
| ENCFF469KDX | ENCFF471ZTS | ENCFF473YGW |
| ENCFF482BDW | ENCFF493EPF | ENCFF502RVO |
| ENCFF519DDH | ENCFF535TAL | ENCFF536KQX |
| ENCFF538YRS | ENCFF540RGI | ENCFF555UBC |
| ENCFF558UJR | ENCFF567ELA | ENCFF569MJS |
| ENCFF574UKD | ENCFF607OBG | ENCFF608MSL |
| ENCFF615EAT | ENCFF616GPO | ENCFF618BDP |
| ENCFF627GBZ | ENCFF634JRD | ENCFF653SLQ |
| ENCFF657NRR | ENCFF658XFZ | ENCFF672HZG |
| ENCFF673HLW | ENCFF673VSN | ENCFF680DFX |
| ENCFF681FKP | ENCFF681MRC | ENCFF683YQZ |
| ENCFF698HVQ | ENCFF712JXT | ENCFF730QNU |
| ENCFF745RUH | ENCFF750UAQ | ENCFF770ENO |
| ENCFF779EDF | ENCFF834UYS | ENCFF836KEF |
| ENCFF838LKZ | ENCFF842JME | ENCFF843PJA |
| ENCFF848IHI | ENCFF869HZM | ENCFF870KJE |
| ENCFF872EBX | ENCFF880CLF | ENCFF885ZWB |
| ENCFF886PSD | ENCFF890XQW | ENCFF898ZLY |
| ENCFF900JDD | ENCFF909CTD | ENCFF918UHB |
| ENCFF921FKB | ENCFF923UMY | ENCFF946CSJ |
| ENCFF952WTH | ENCFF967TFR | ENCFF993GPP |

---

**Table 6:** ChIP-Seq files used in computing the relative binding of RNA Polymerase subunit 2 to exons of types I,II and 0. Each of the entries refers to a BED file downloaded from ENCODE (43).

| #Tissues             | GTE <sub>x</sub> | Zhou et al | Flam et al | Marino et al | Combined |
|----------------------|------------------|------------|------------|--------------|----------|
| GTE <sub>x</sub> > 0 | 6,874            | 15         | 426        | 171          | 573      |
| GTE <sub>x</sub> > 1 | 989              | 2          | 53         | 50           | 89       |

**Table 7: Number of coupled exons overlapping between datasets, breakdown to those that appear in at least one tissue and those that appear in multiple tissues..** The number of exons that were detected as UHP/DHP in GTE<sub>x</sub>, in at least one tissue (first row) or more than one tissue (second row), and overlapping with each one of the separate datasets, or with all the UHP/DHP exons detected in any separate dataset (last column labeled 'Combined').

| <b>Tissue</b>           | <b>Type 0</b> | <b>UHP</b> | <b>DHP</b> |
|-------------------------|---------------|------------|------------|
| Adrenal Gland           | 30085         | 712        | 642        |
| Brain - Cortex          | 30984         | 838        | 867        |
| Breast - Mammary Tissue | 33695         | 82         | 303        |
| Heart - Left Ventricle  | 12608         | 2082       | 1068       |
| Liver                   | 26776         | 233        | 214        |
| Pancreas                | 26026         | 17         | 5          |
| Pituitary               | 36962         | 89         | 232        |
| Spleen                  | 35342         | 82         | 511        |
| Thyroid                 | 25819         | 56         | 249        |

**Table 8: Number of UHP, DHP and Type 0 exons identified in each tissue.** The total number of distinct exons that were identified as either UHP, DHP or Type 0 in each GTEx tissue. The total includes exons that were identified in multiple tissues. Exons that were identified in at least one tissue as UHP or DHP are considered coupled and are not included in the Type 0 counts.
